# Supplementary material for: The intrinsic stabilities and structures of alkali metal cationized guanine quadruplexes
Source: Royal Society of Chemistry journal article supplement (doi:10.1039/c6cp07301h), 2016-11-25

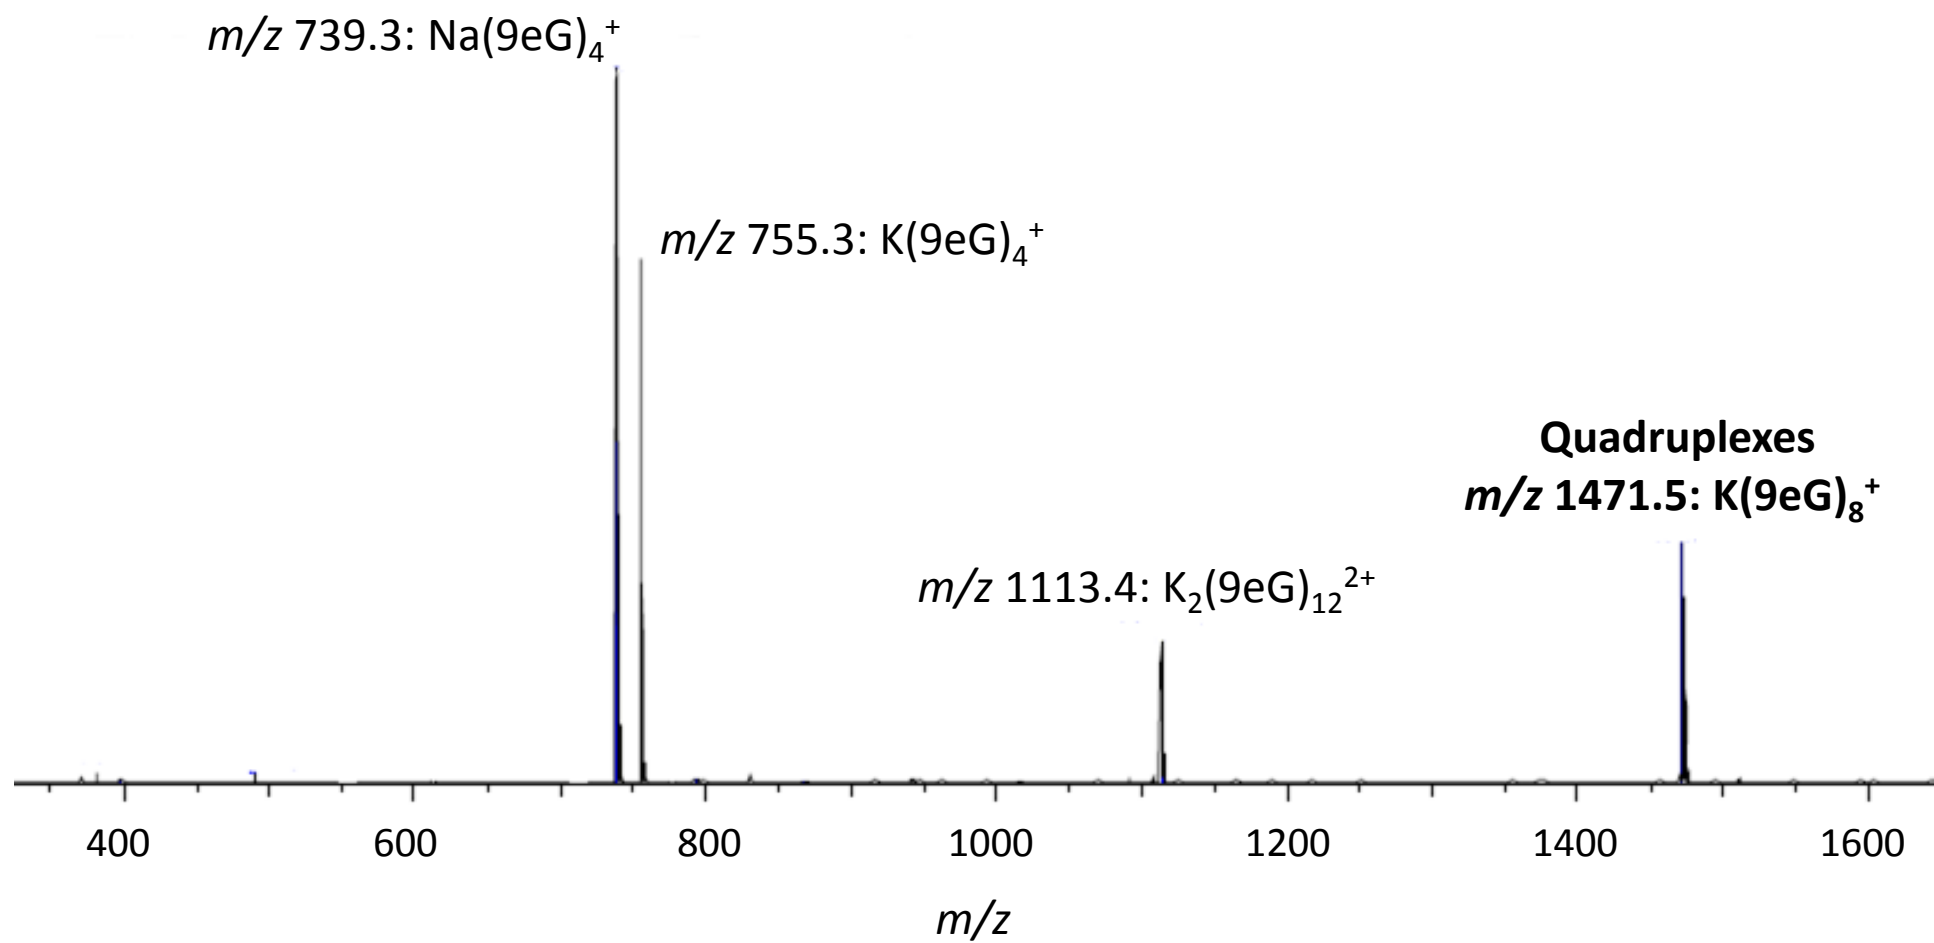

Figure S1

Figure S2

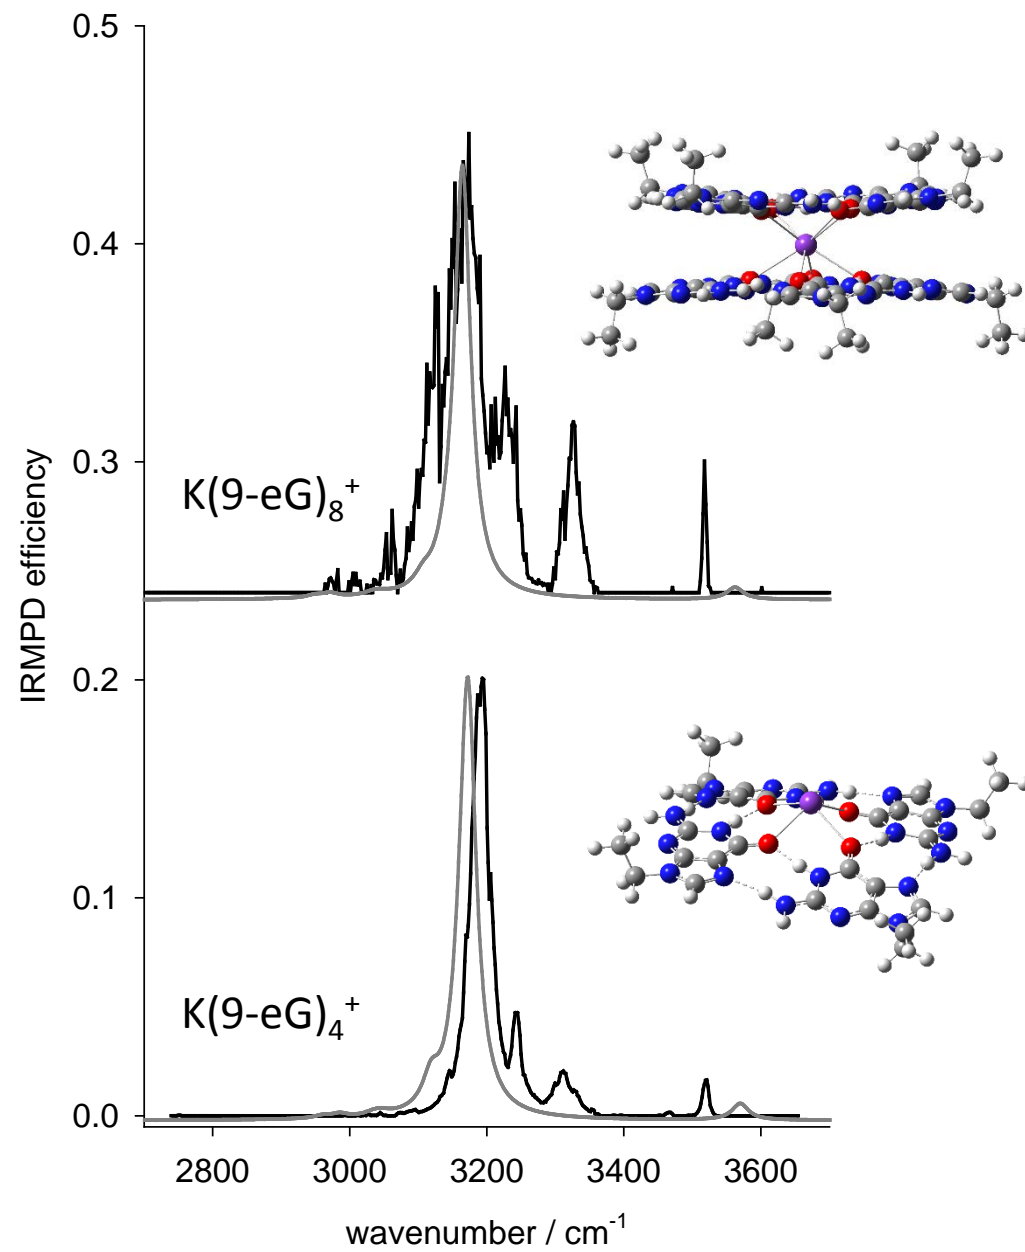

Figure S3

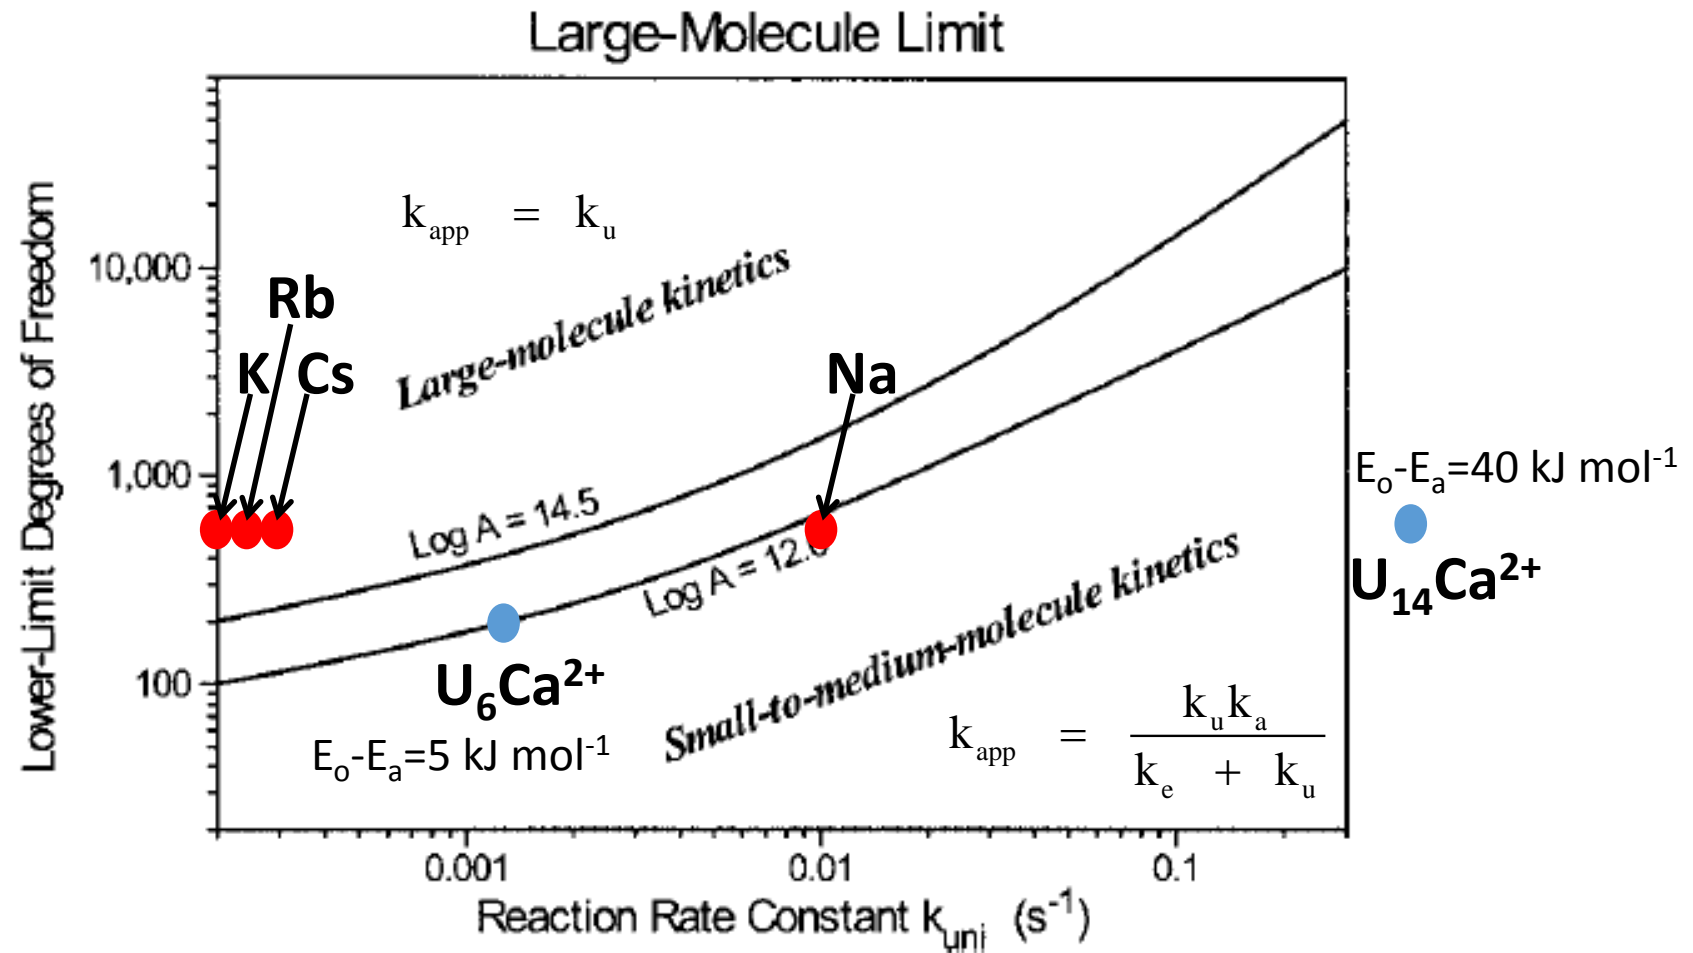

Dunbar, R.C. *Mass Spectrom. Rev.* **2004**, 23, 127.

● E.A.L. Gillis, M. Demireva, K. Nanda, G.J.O. Beran, E. Williams, and T.D. Fridgen *Phys. Chem. Chem. Phys.* **2012**, 14, 3304.

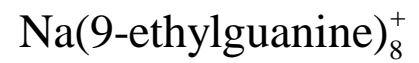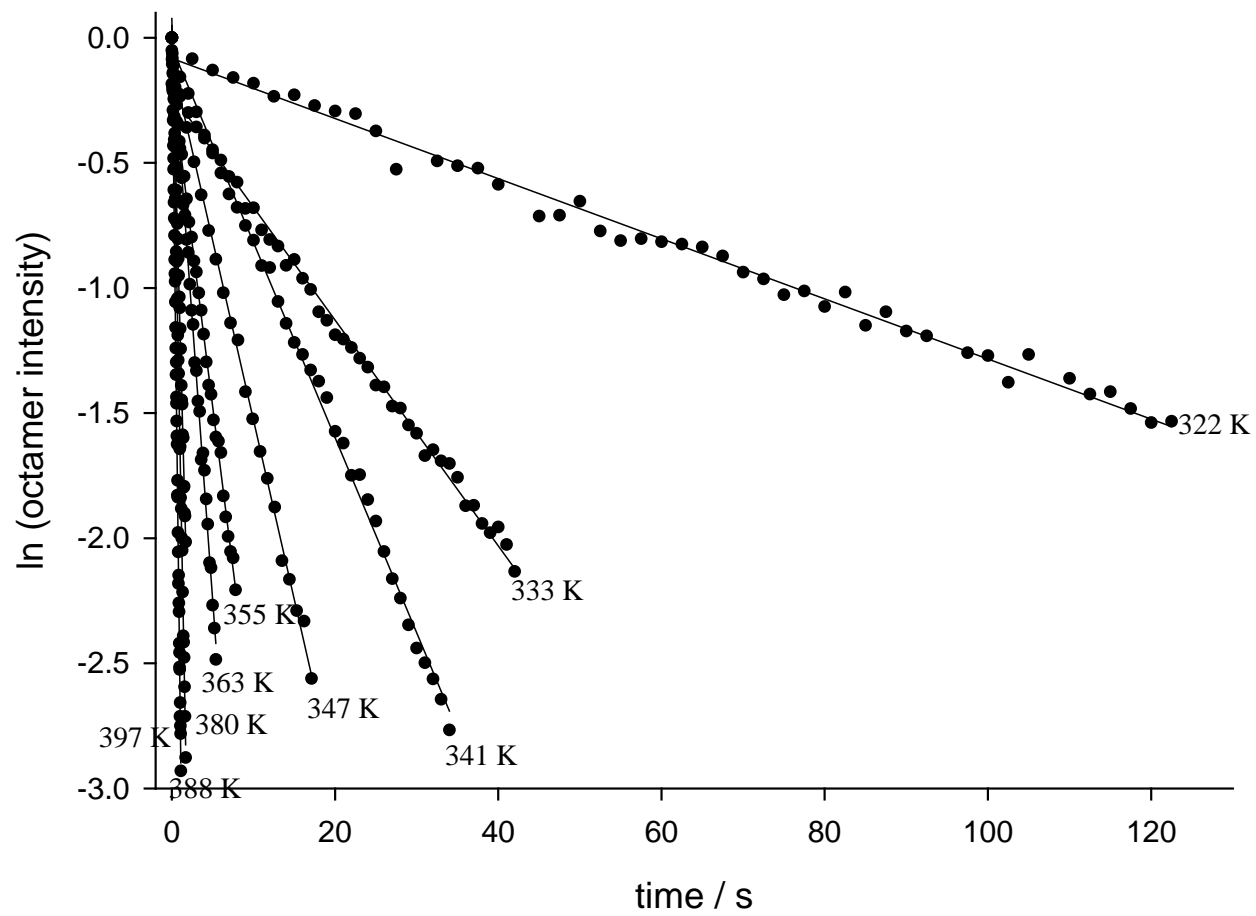

Figure S4.

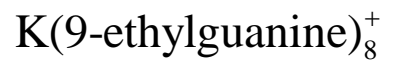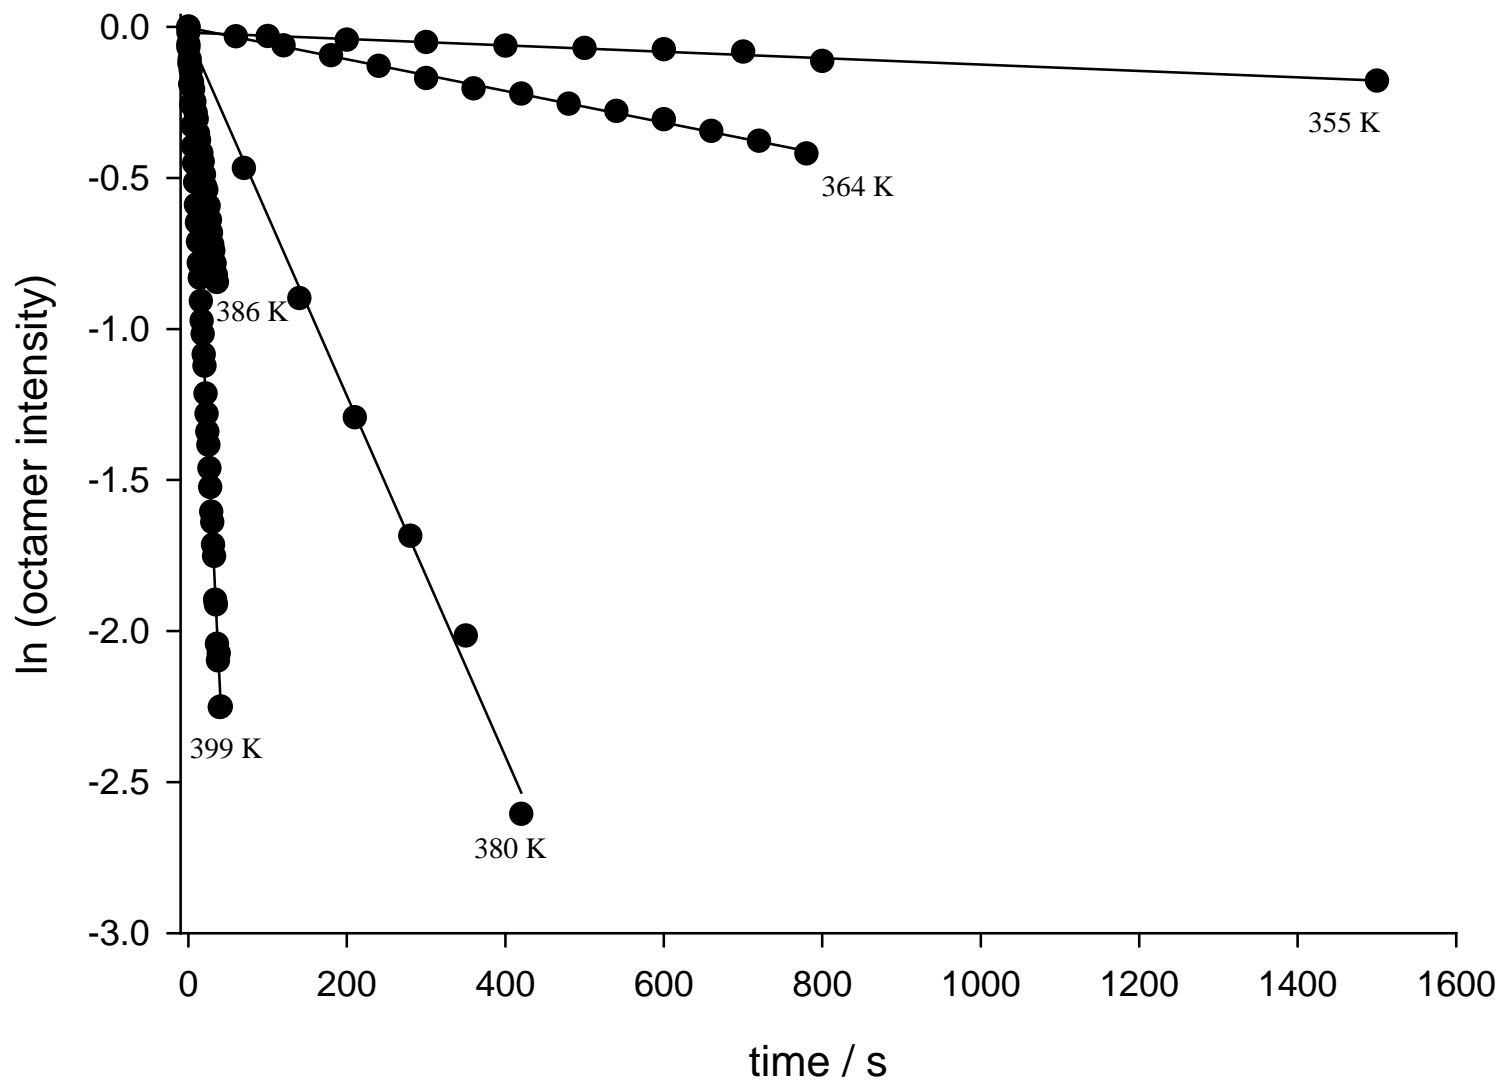

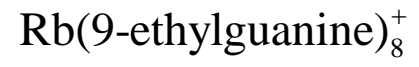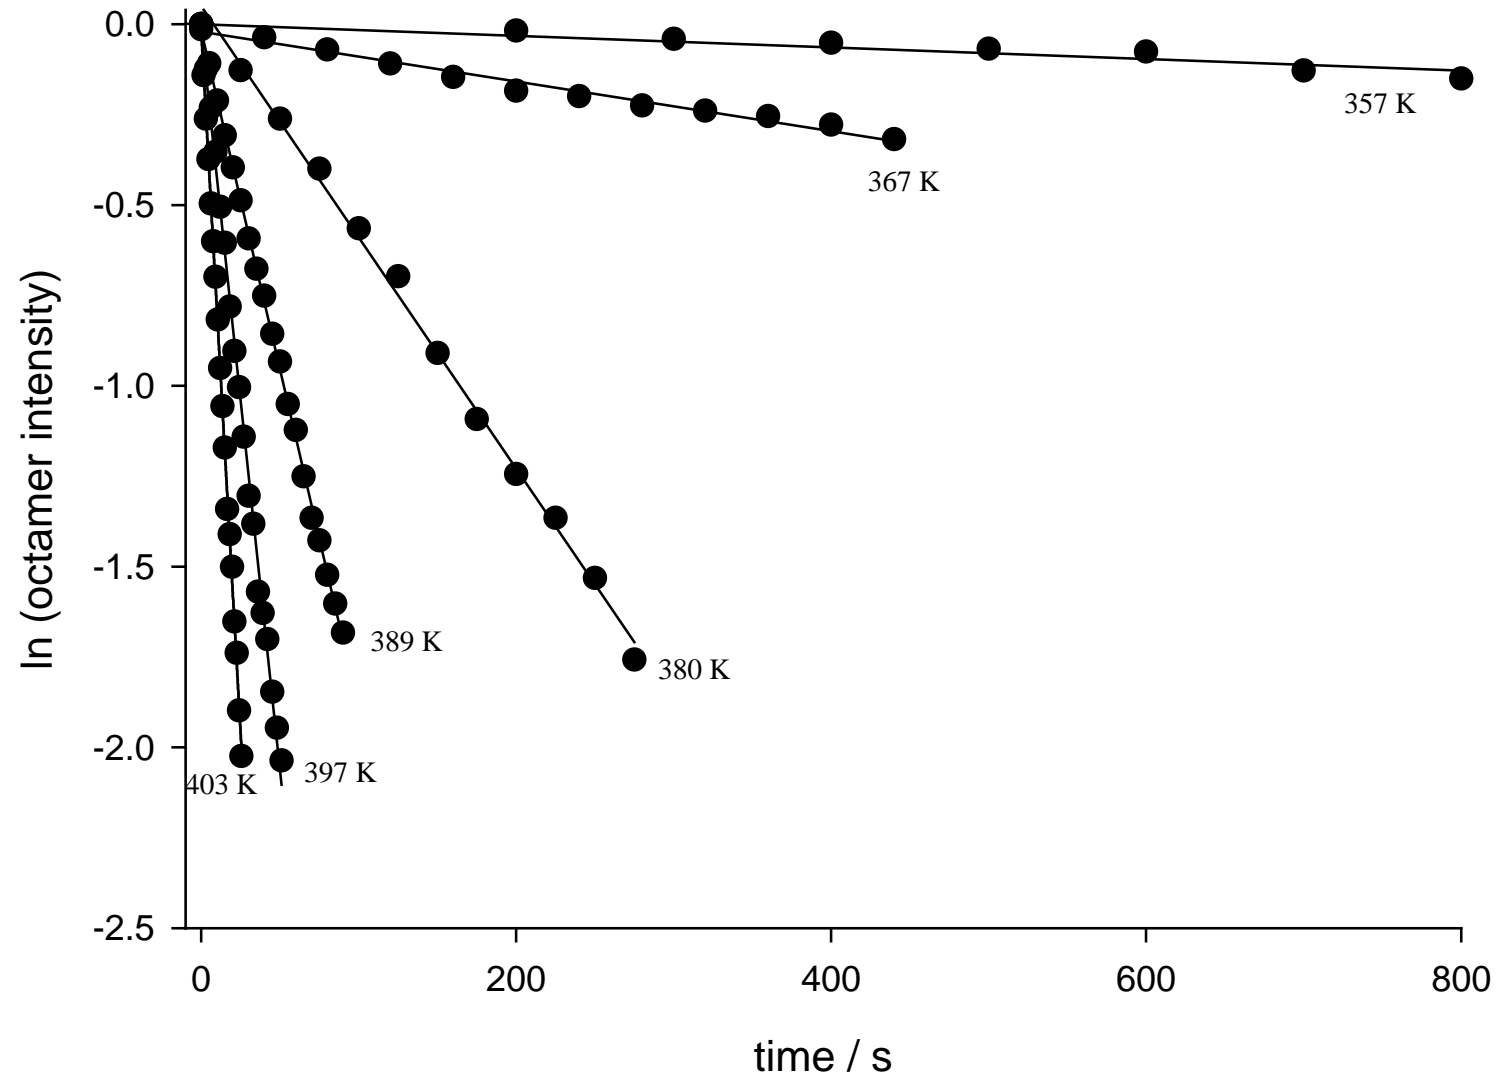

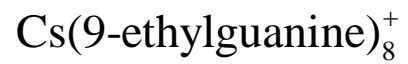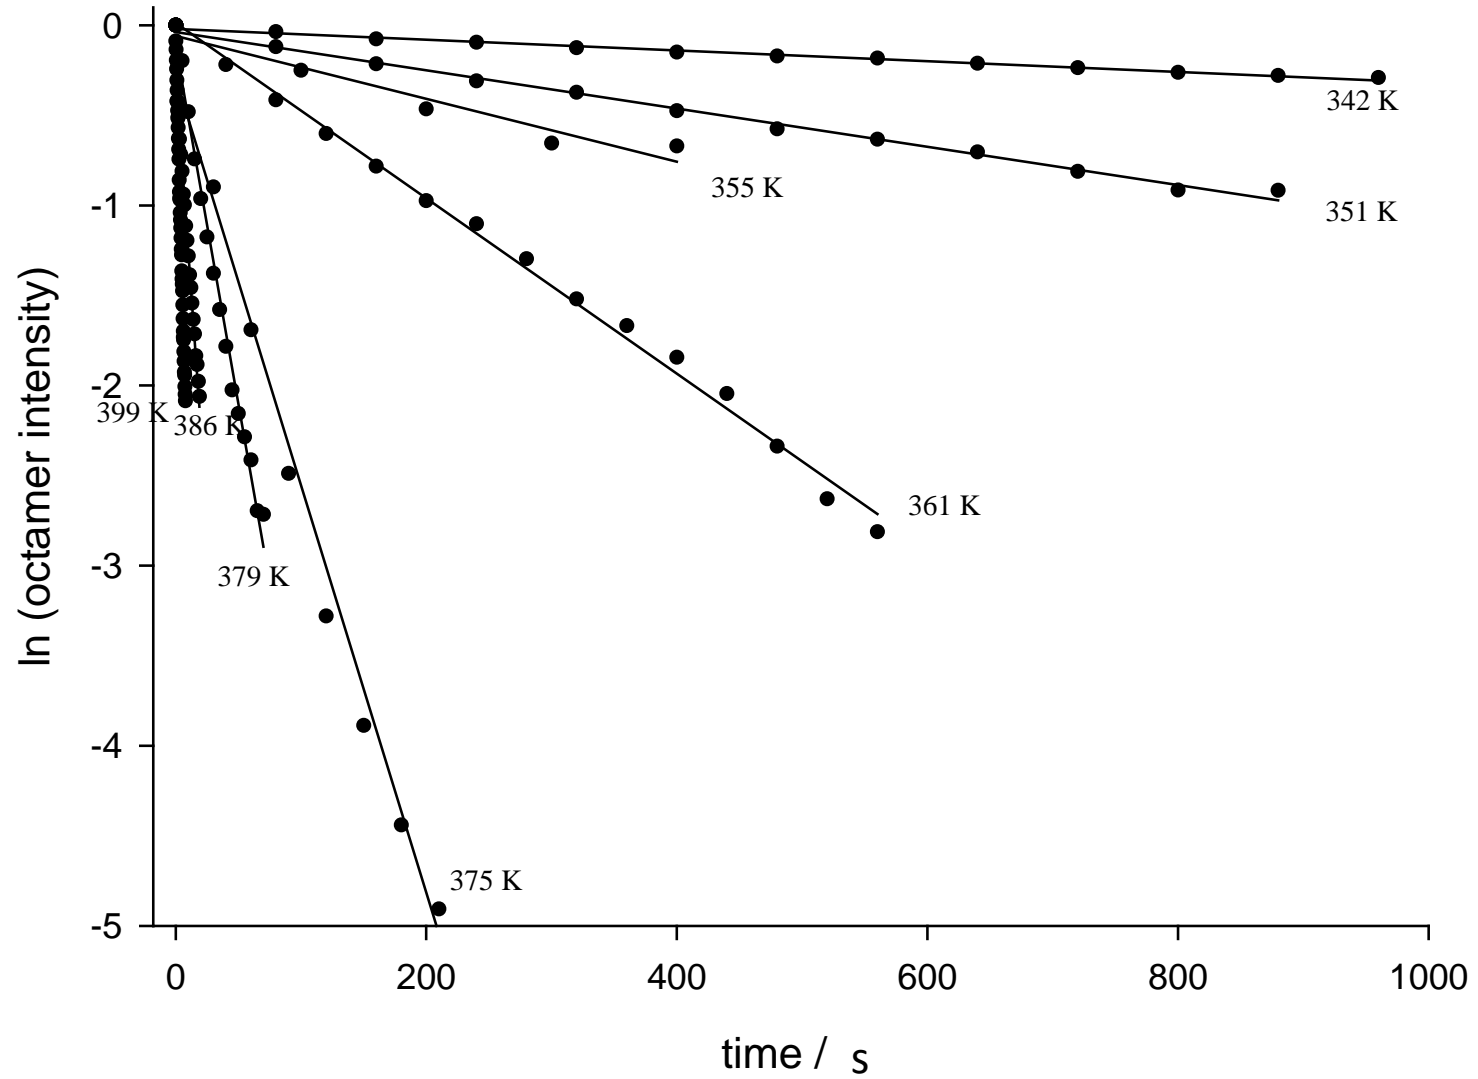

| $\text{Na}(9\text{eG})_8^+$                              | $\text{K}(9\text{eG})_8^+$                               | $\text{Rb}(9\text{eG})_8^+$                              | $\text{Cs}(9\text{eG})_8^+$                               |
|----------------------------------------------------------|----------------------------------------------------------|----------------------------------------------------------|-----------------------------------------------------------|
| $k_{322} = 1.20(\pm 0.02) \times 10^{-2} \text{ s}^{-1}$ | —                                                        | —                                                        | —                                                         |
| $k_{333} = 4.45(\pm 0.04) \times 10^{-2} \text{ s}^{-1}$ | —                                                        | —                                                        | —                                                         |
| $k_{341} = 7.48(\pm 0.07) \times 10^{-2} \text{ s}^{-1}$ | —                                                        | —                                                        | $k_{342} = 1.98(\pm 0.09) \times 10^{-4} \text{ s}^{-1}$  |
| $k_{347} = 1.42(\pm 0.02) \times 10^{-1} \text{ s}^{-1}$ | —                                                        | —                                                        | $k_{351} = 1.06 (\pm 0.03) \times 10^{-3} \text{ s}^{-1}$ |
| $k_{355} = 2.60(\pm 0.02) \times 10^{-1} \text{ s}^{-1}$ | $k_{355} = 1.06(\pm 0.03) \times 10^{-4} \text{ s}^{-1}$ | $k_{357} = 2.13(\pm 0.16) \times 10^{-4} \text{ s}^{-1}$ | $k_{355} = 1.63(\pm 0.22) \times 10^{-3} \text{ s}^{-1}$  |
| $k_{363} = 4.47(\pm 0.04) \times 10^{-1} \text{ s}^{-1}$ | $k_{364} = 5.24(\pm 0.07) \times 10^{-4} \text{ s}^{-1}$ | $k_{367} = 6.88(\pm 0.32) \times 10^{-4} \text{ s}^{-1}$ | $k_{361} = 4.87(\pm 0.10) \times 10^{-3} \text{ s}^{-1}$  |
| $k_{380} = 1.21(\pm 0.02) \text{ s}^{-1}$                | $k_{380} = 5.70(\pm 0.02) \times 10^{-3} \text{ s}^{-1}$ | $k_{380} = 6.40(\pm 0.11) \times 10^{-3} \text{ s}^{-1}$ | $k_{379} = 3.97(\pm 0.11) \times 10^{-2} \text{ s}^{-1}$  |
| $k_{388} = 1.73(\pm 0.02) \text{ s}^{-1}$                | $k_{386} = 2.10(\pm 0.03) \times 10^{-2} \text{ s}^{-1}$ | $k_{389} = 1.88(\pm 0.01) \times 10^{-2} \text{ s}^{-1}$ | $k_{386} = 9.19(\pm 0.09) \times 10^{-2} \text{ s}^{-1}$  |
| $k_{397} = 2.68(\pm 0.02) \text{ s}^{-1}$                | $k_{398} = 5.36(\pm 0.04) \times 10^{-2} \text{ s}^{-1}$ | $k_{403} = 7.77(\pm 0.06) \times 10^{-2} \text{ s}^{-1}$ | $k_{399} = 267(\pm 0.02) \times 10^{-1} \text{ s}^{-1}$   |

Table 1



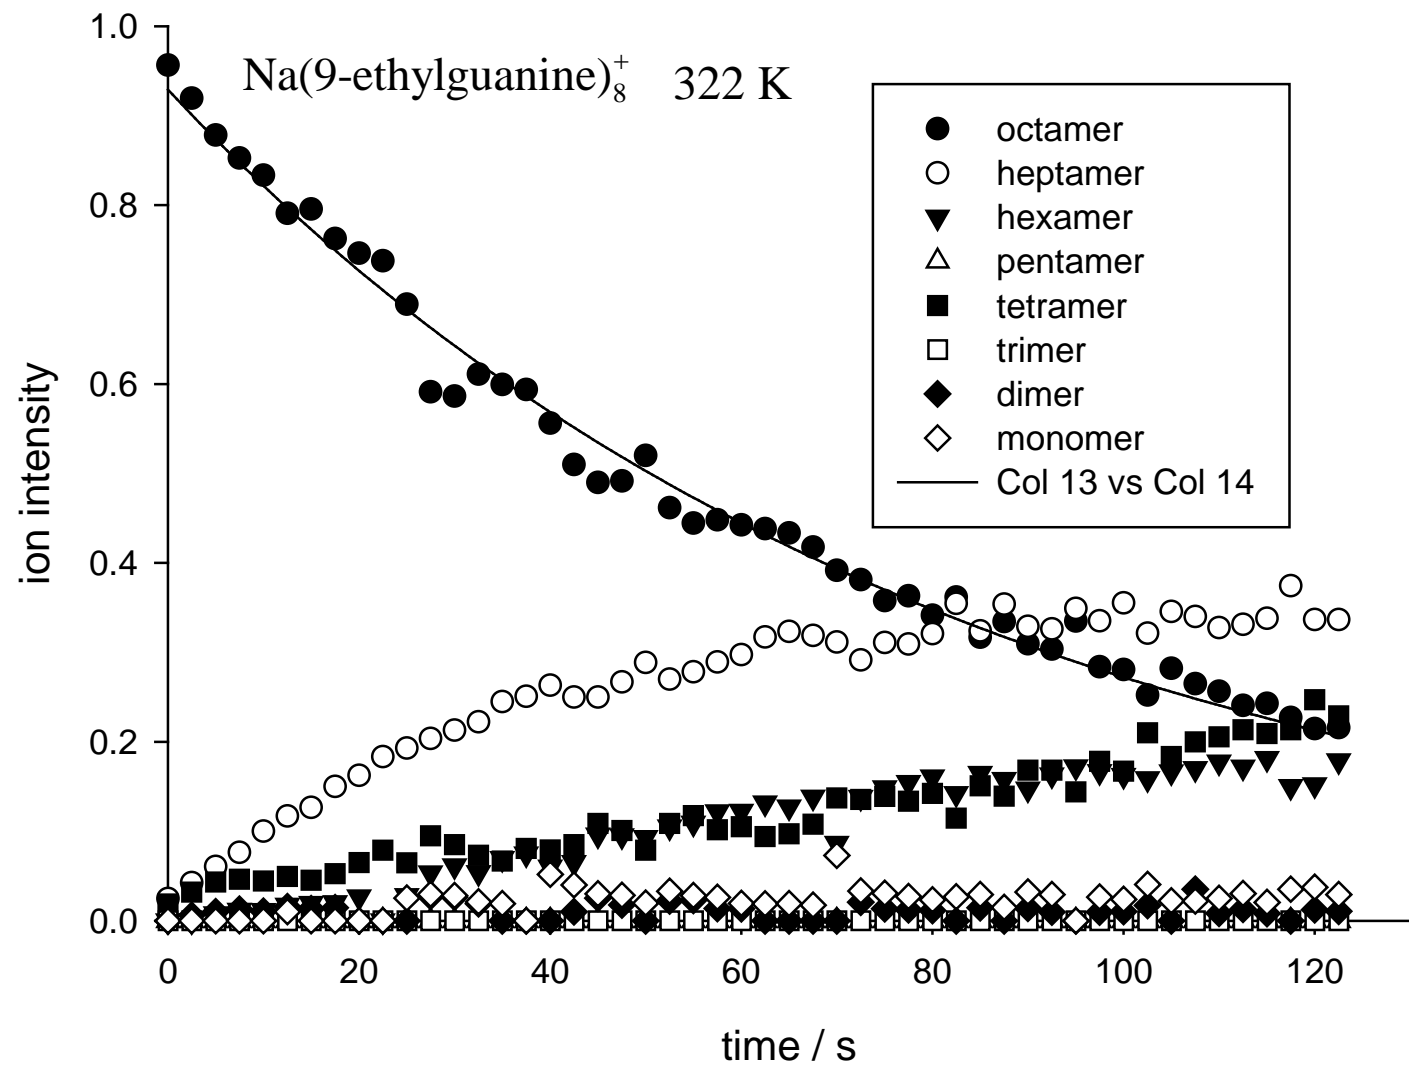

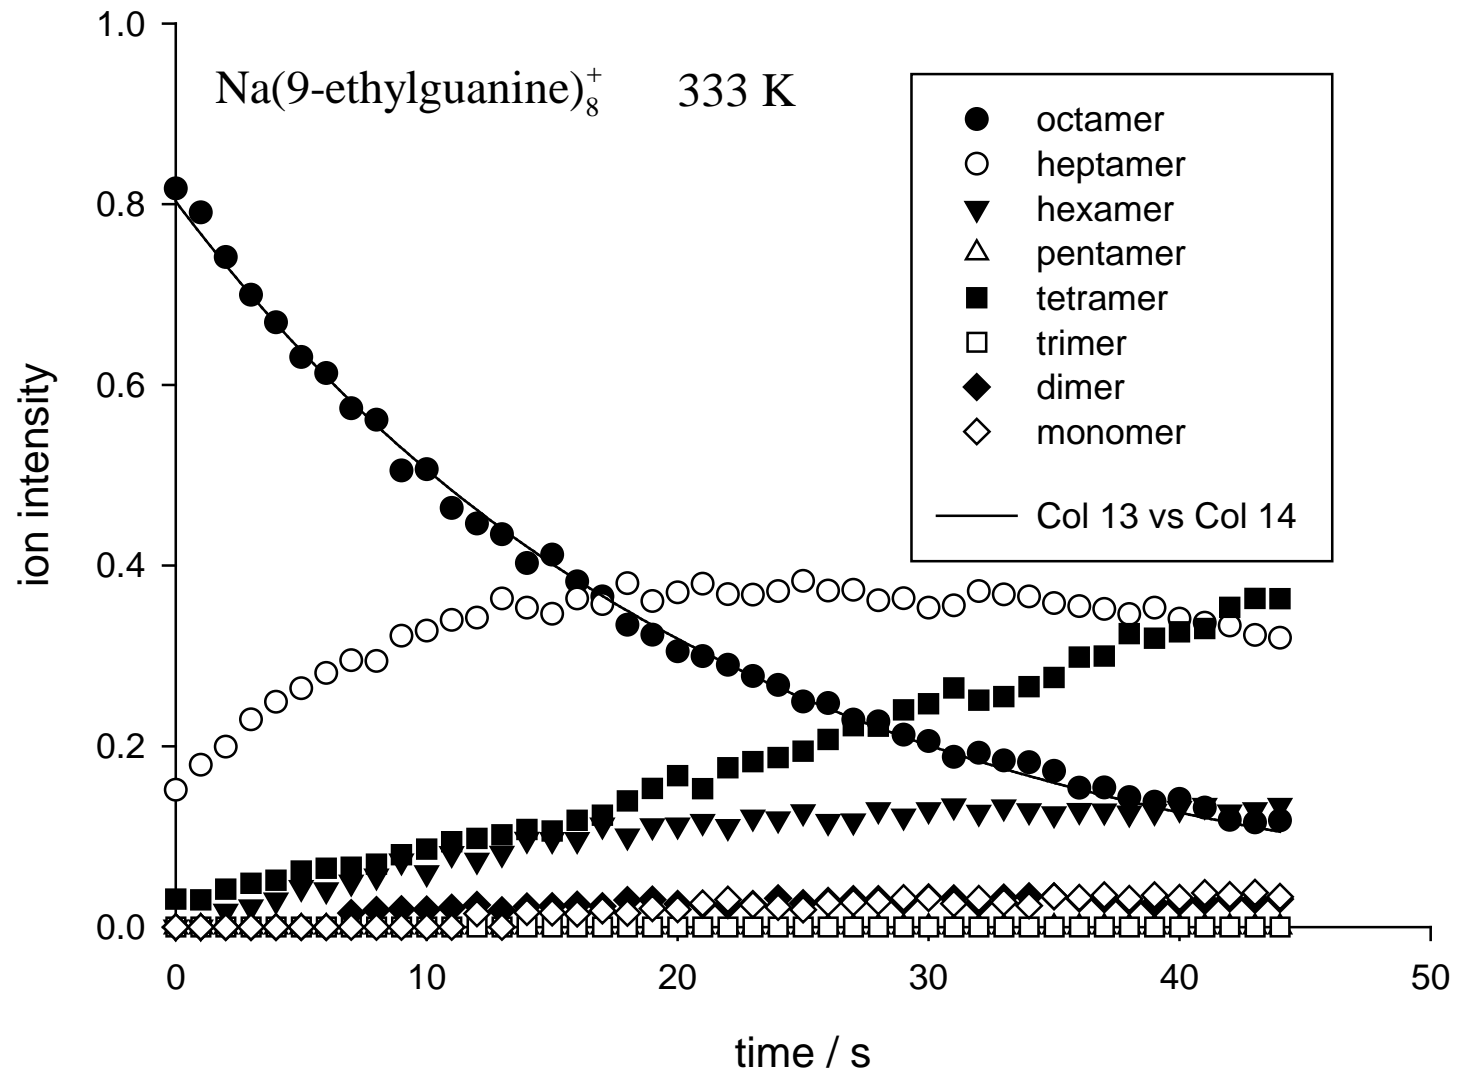

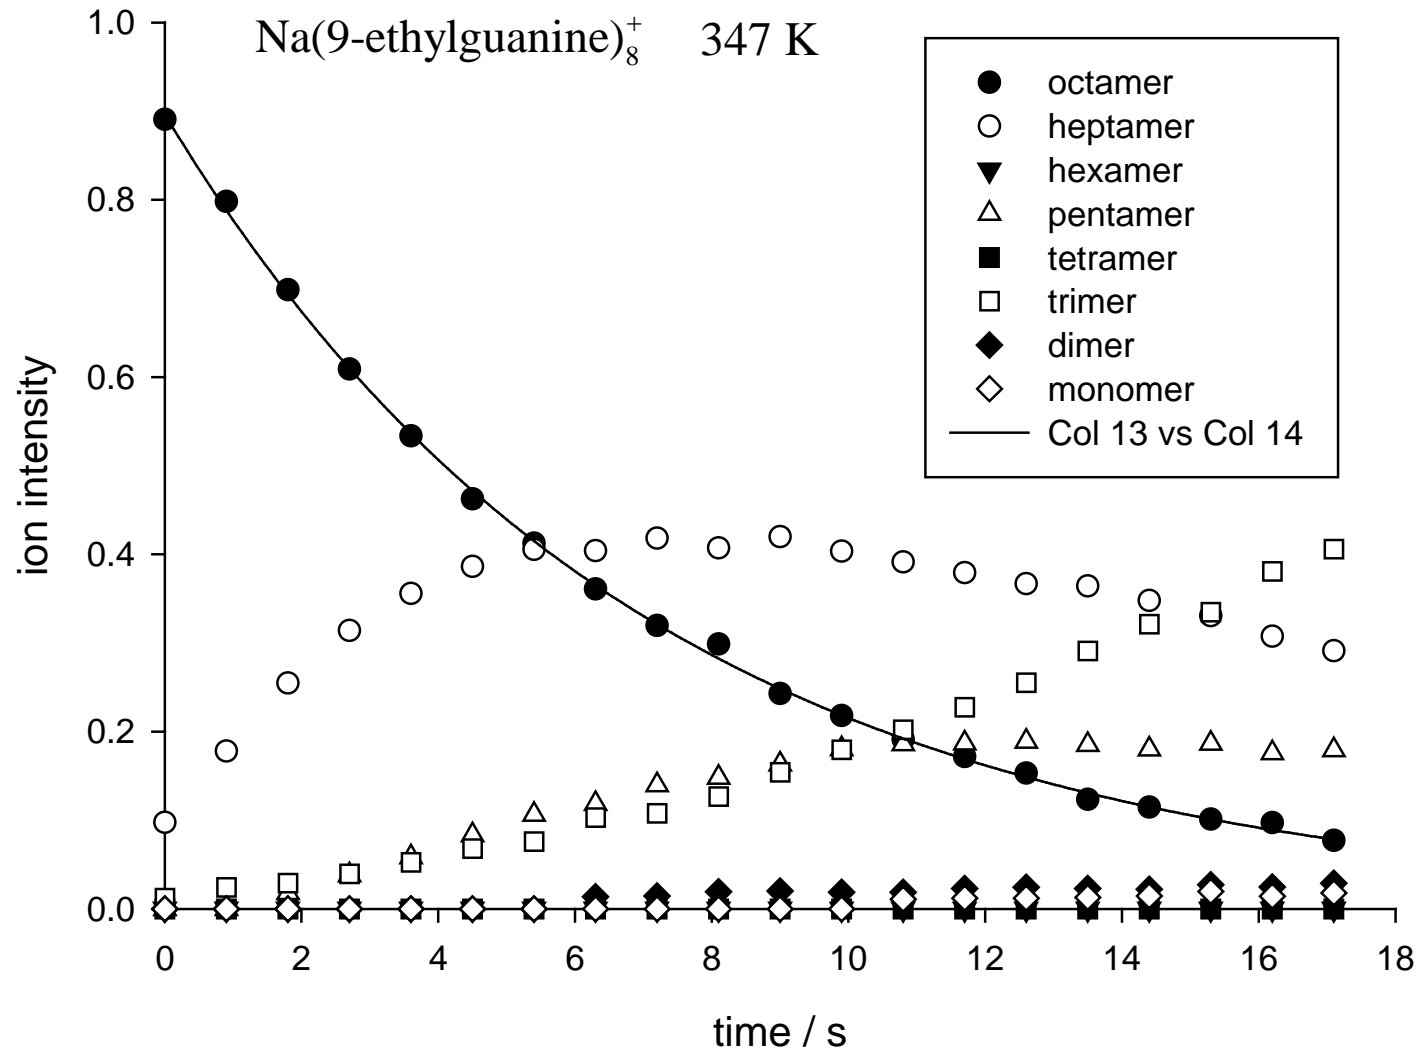

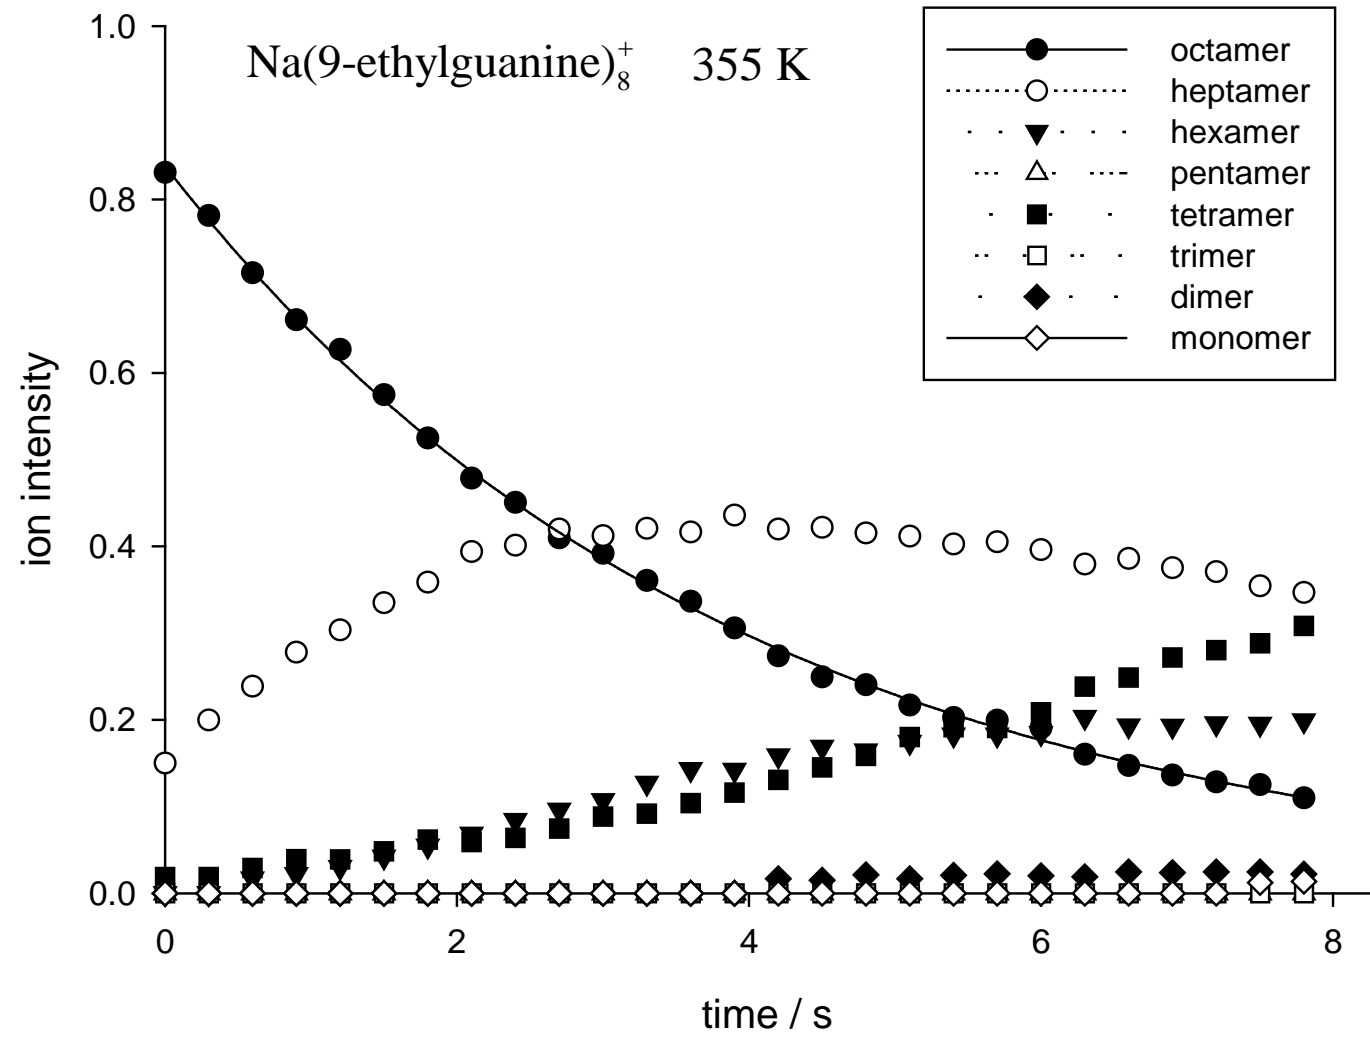

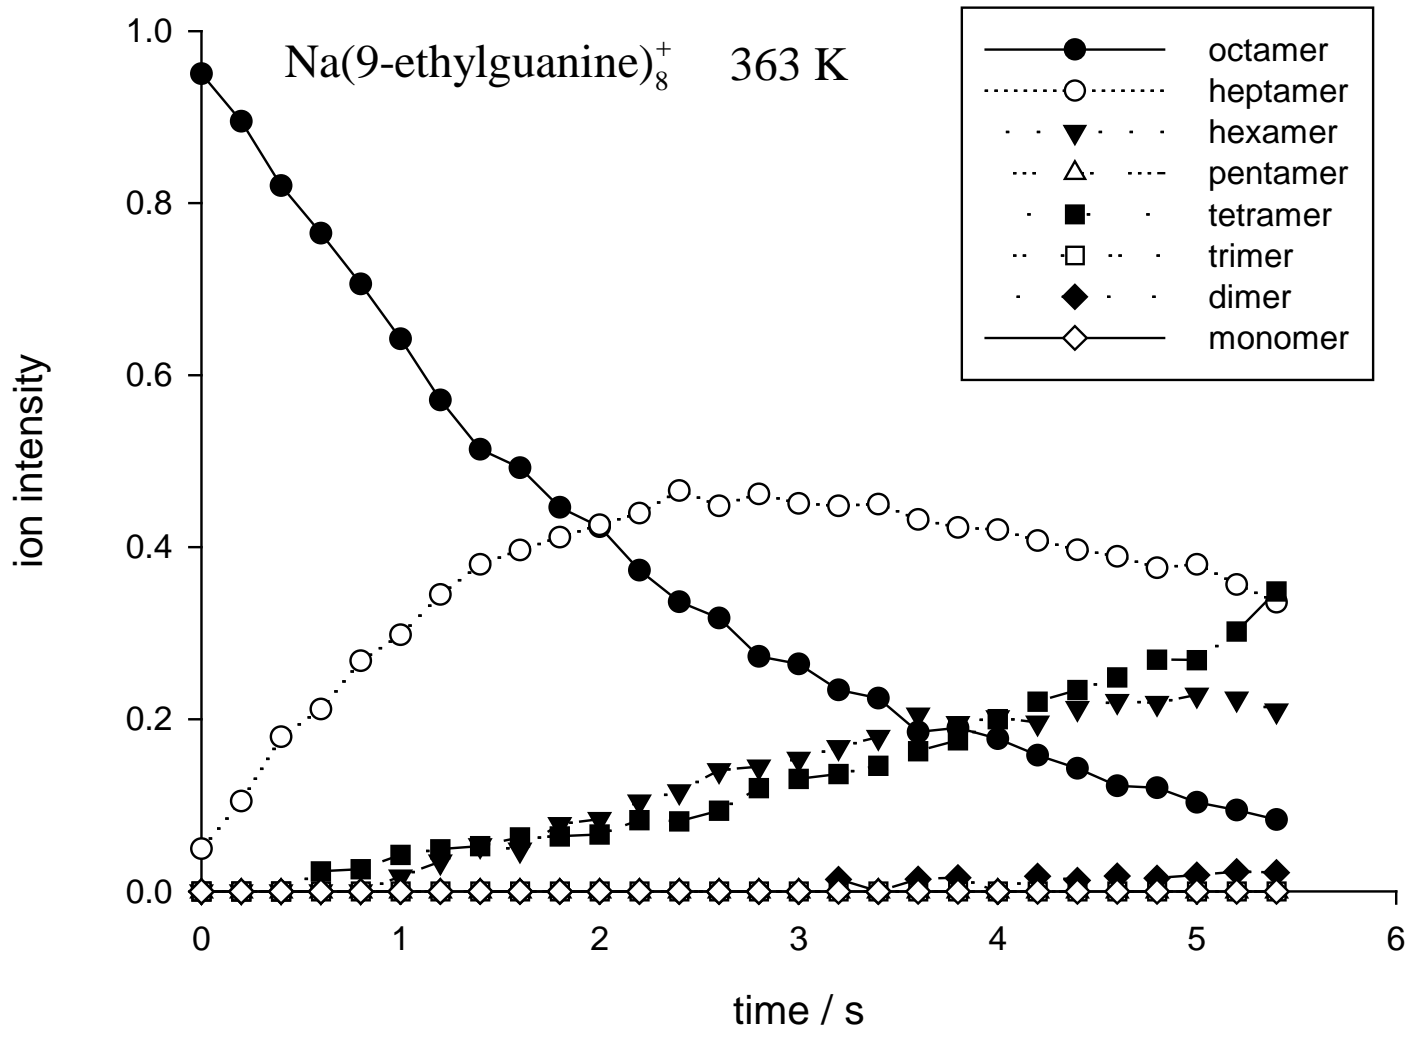

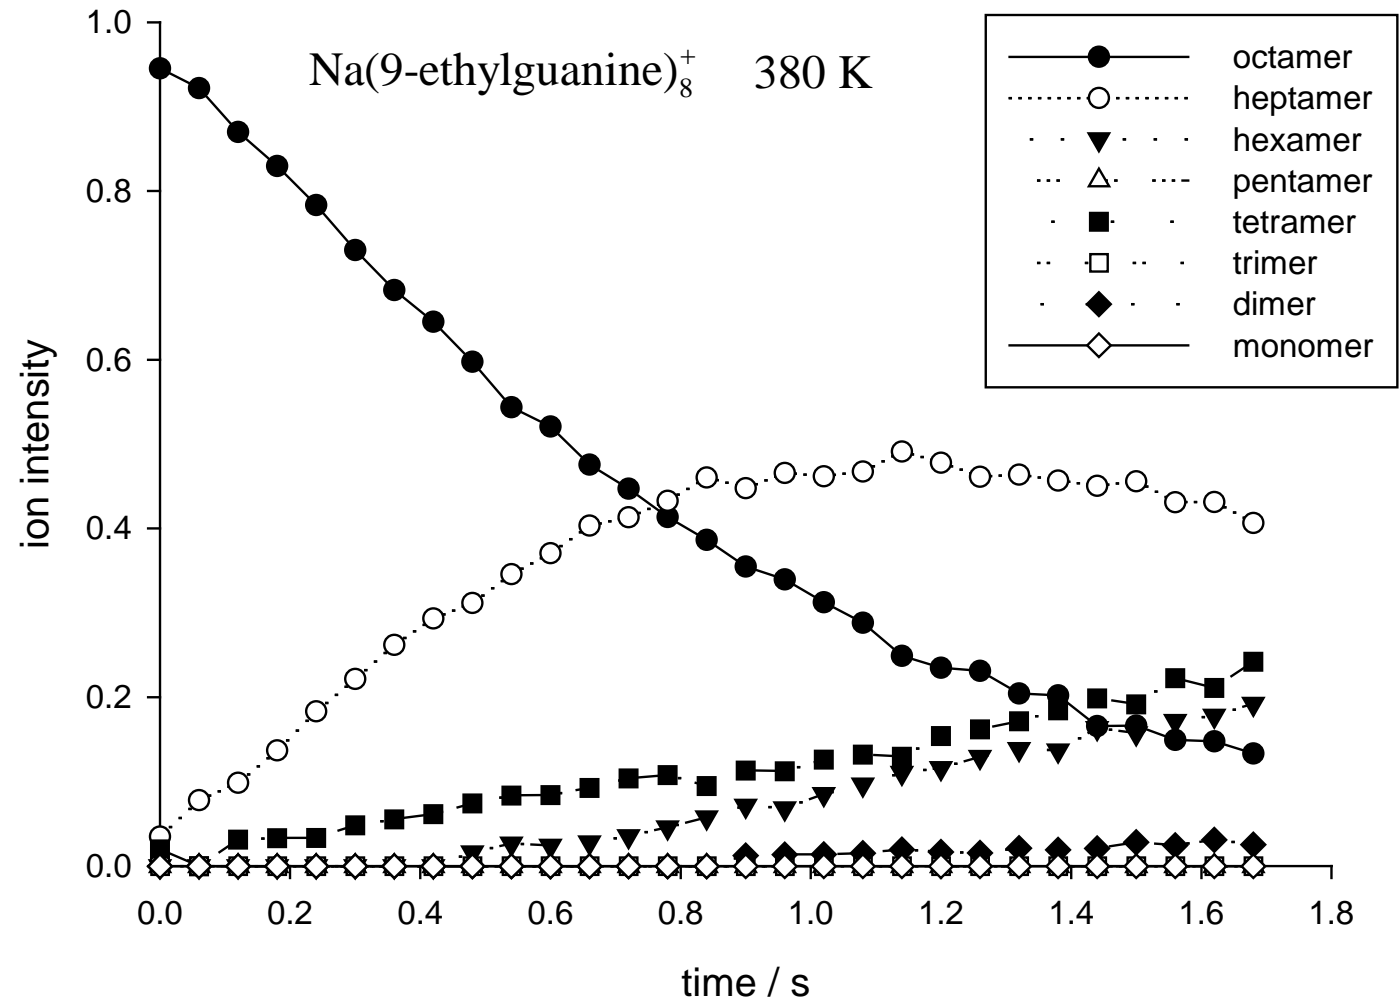

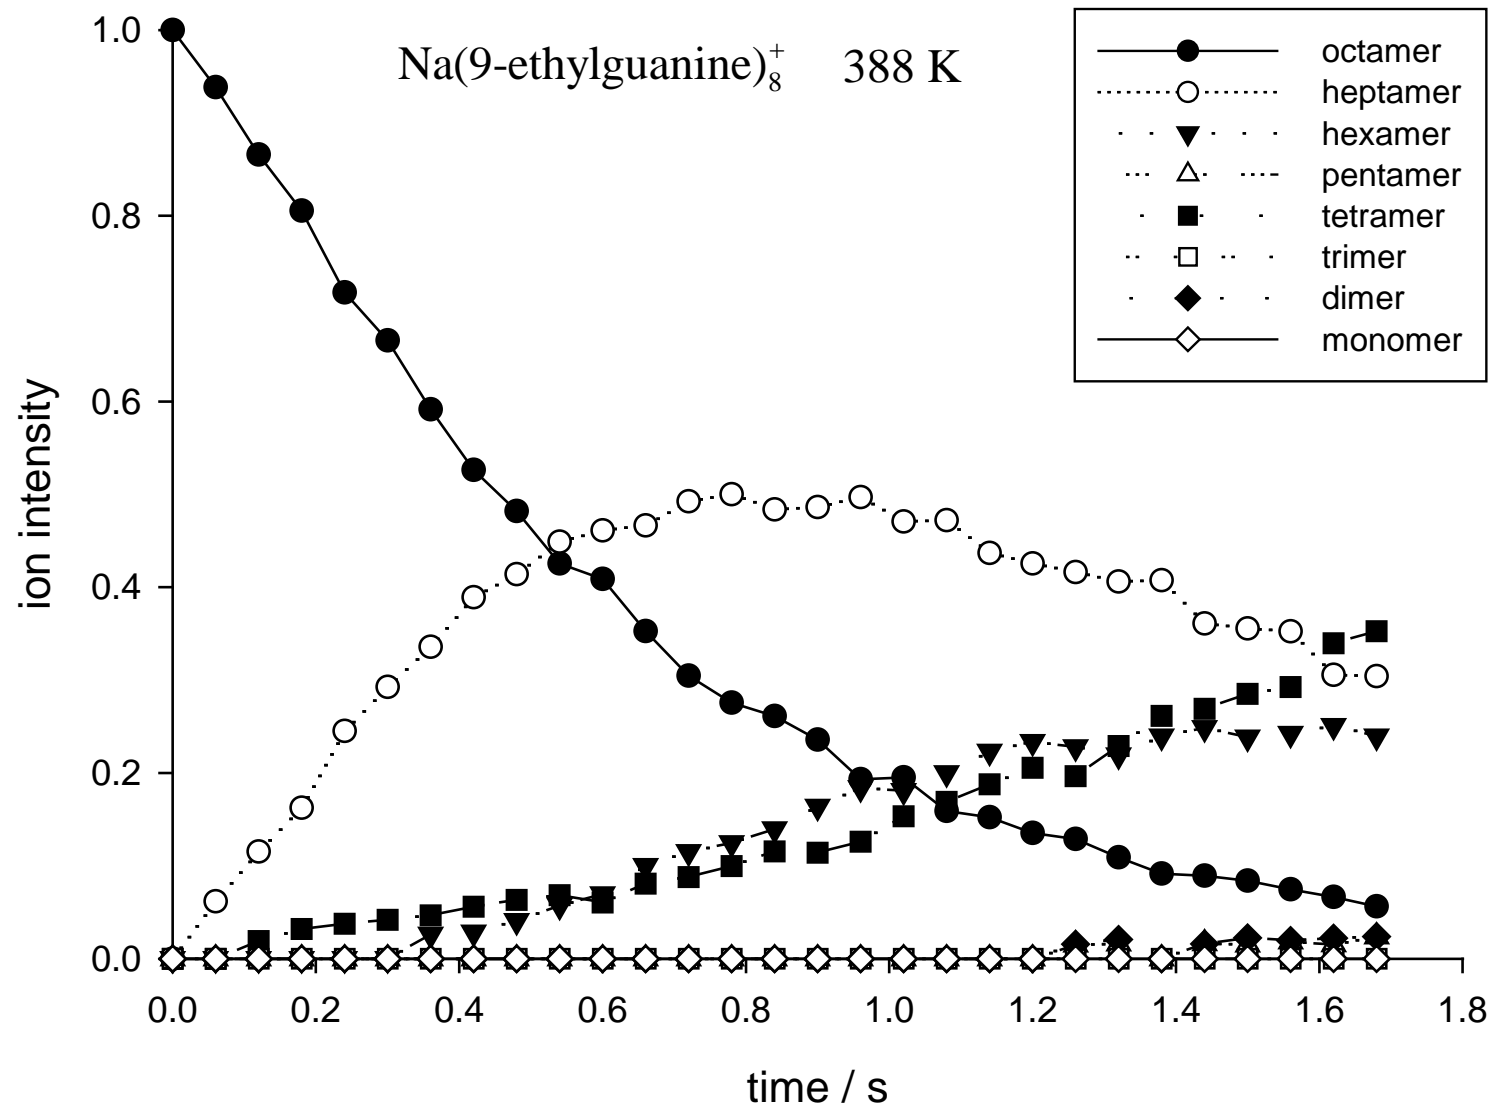

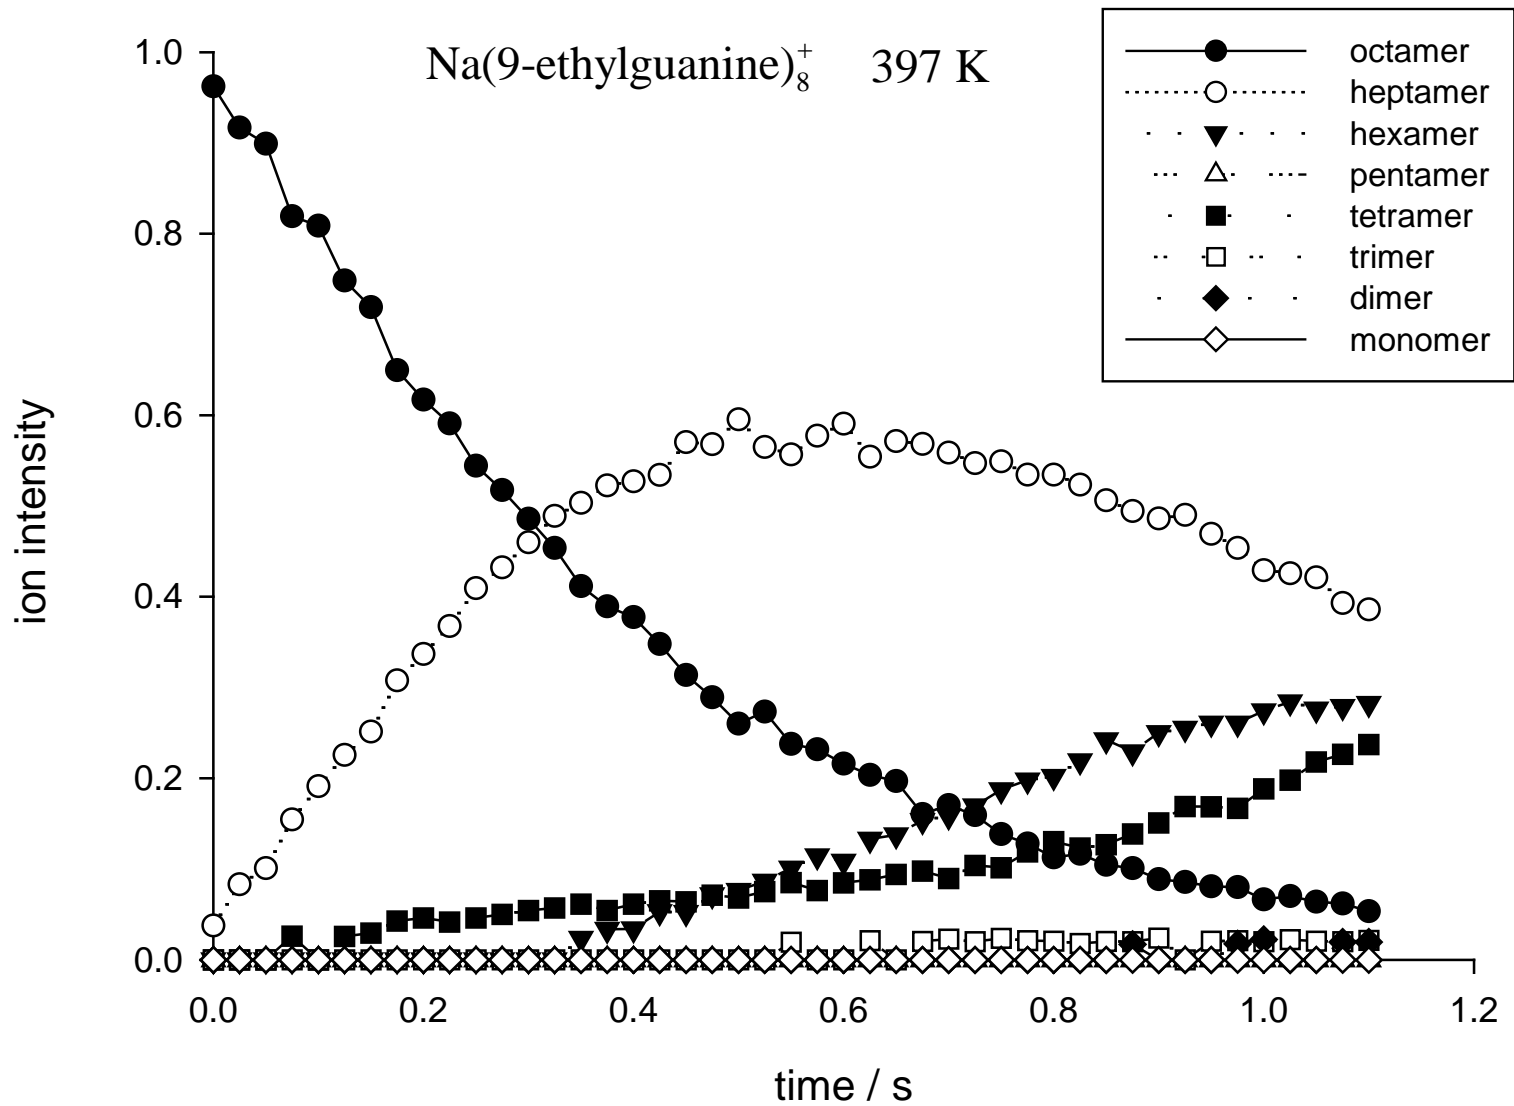



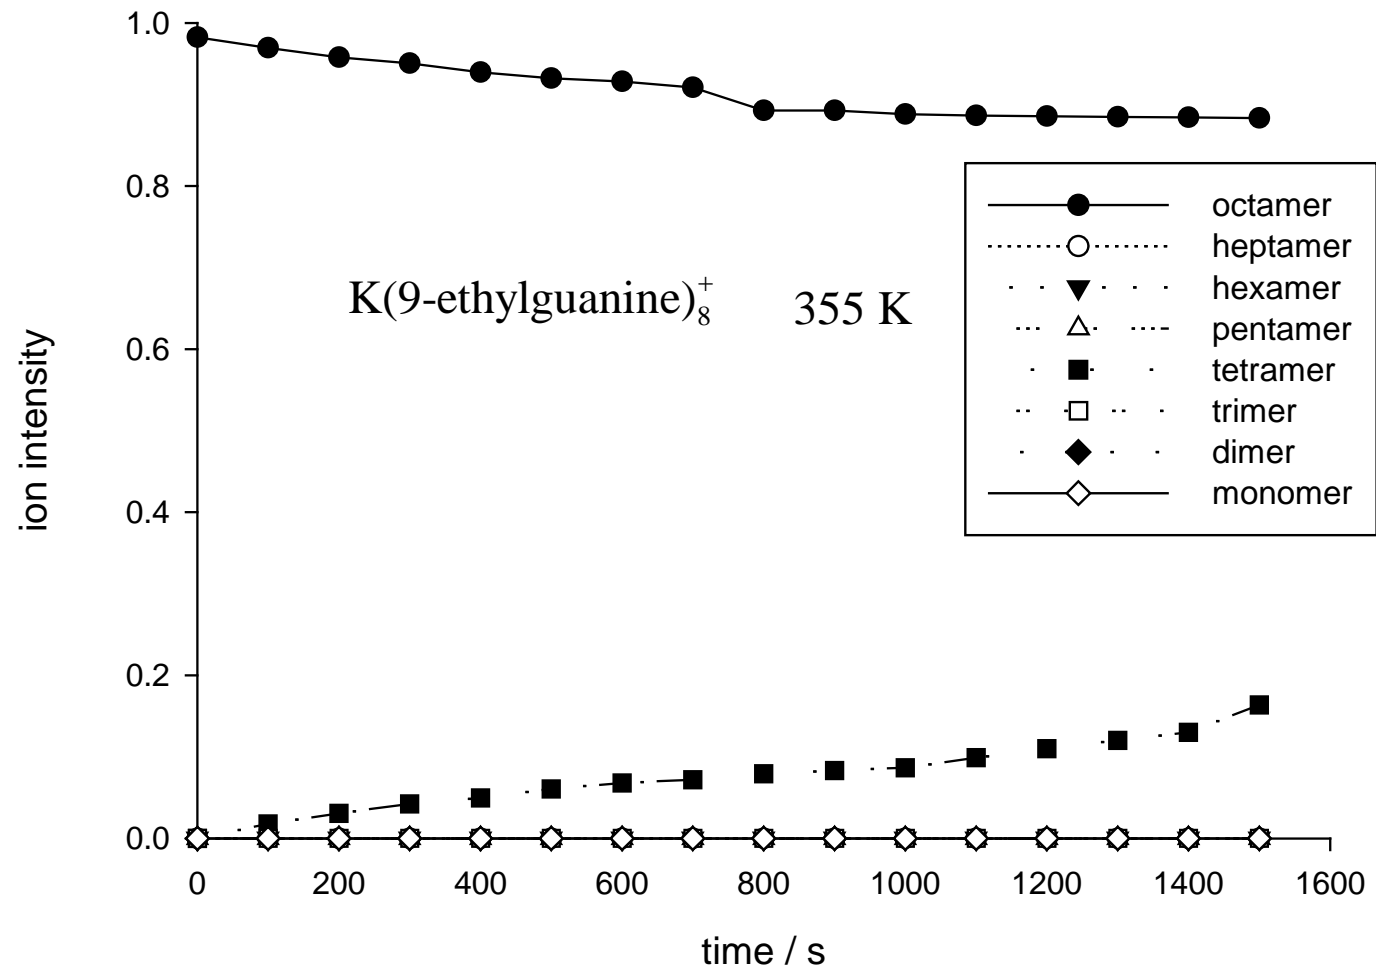

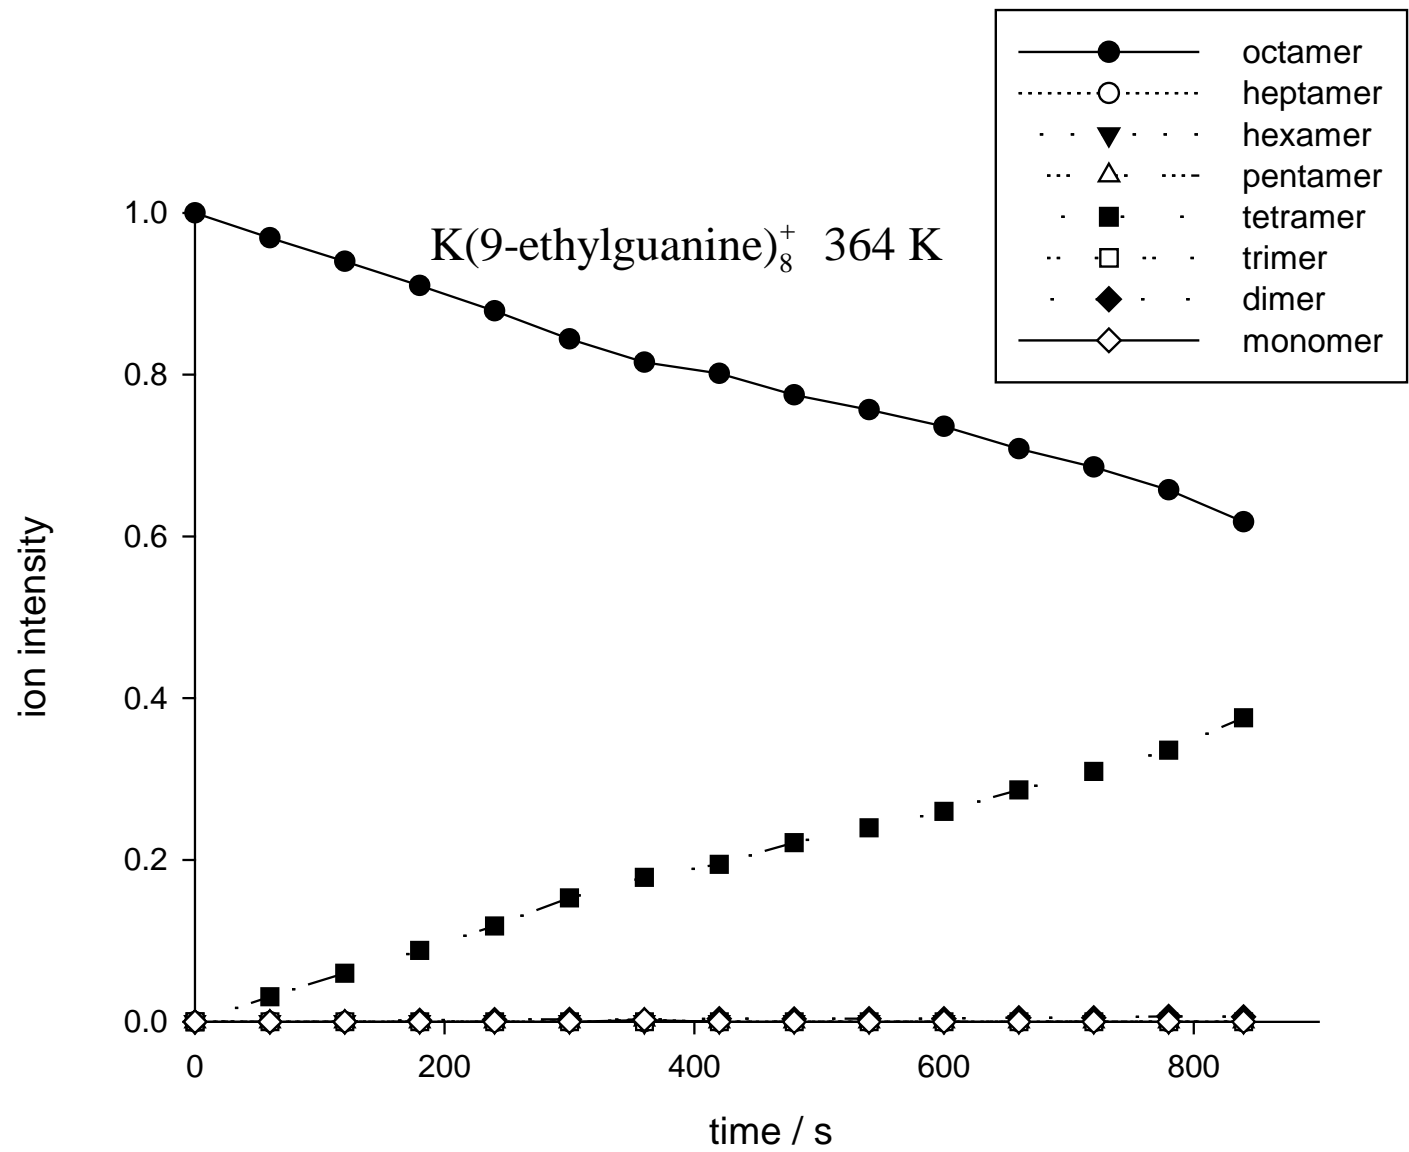

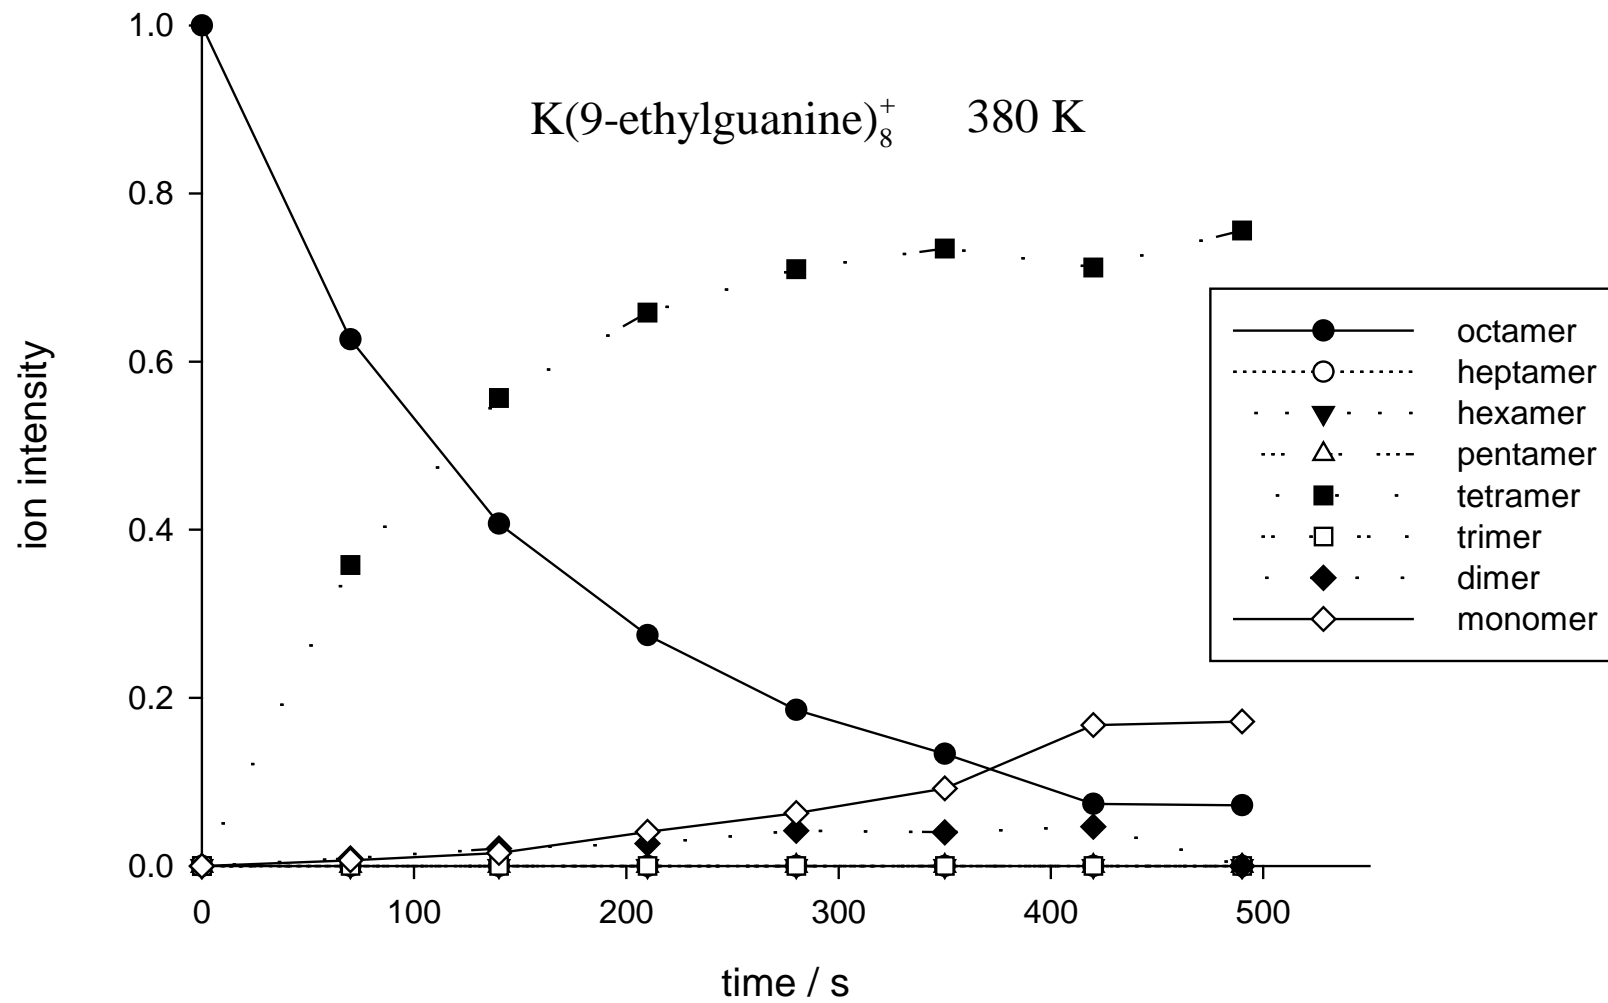

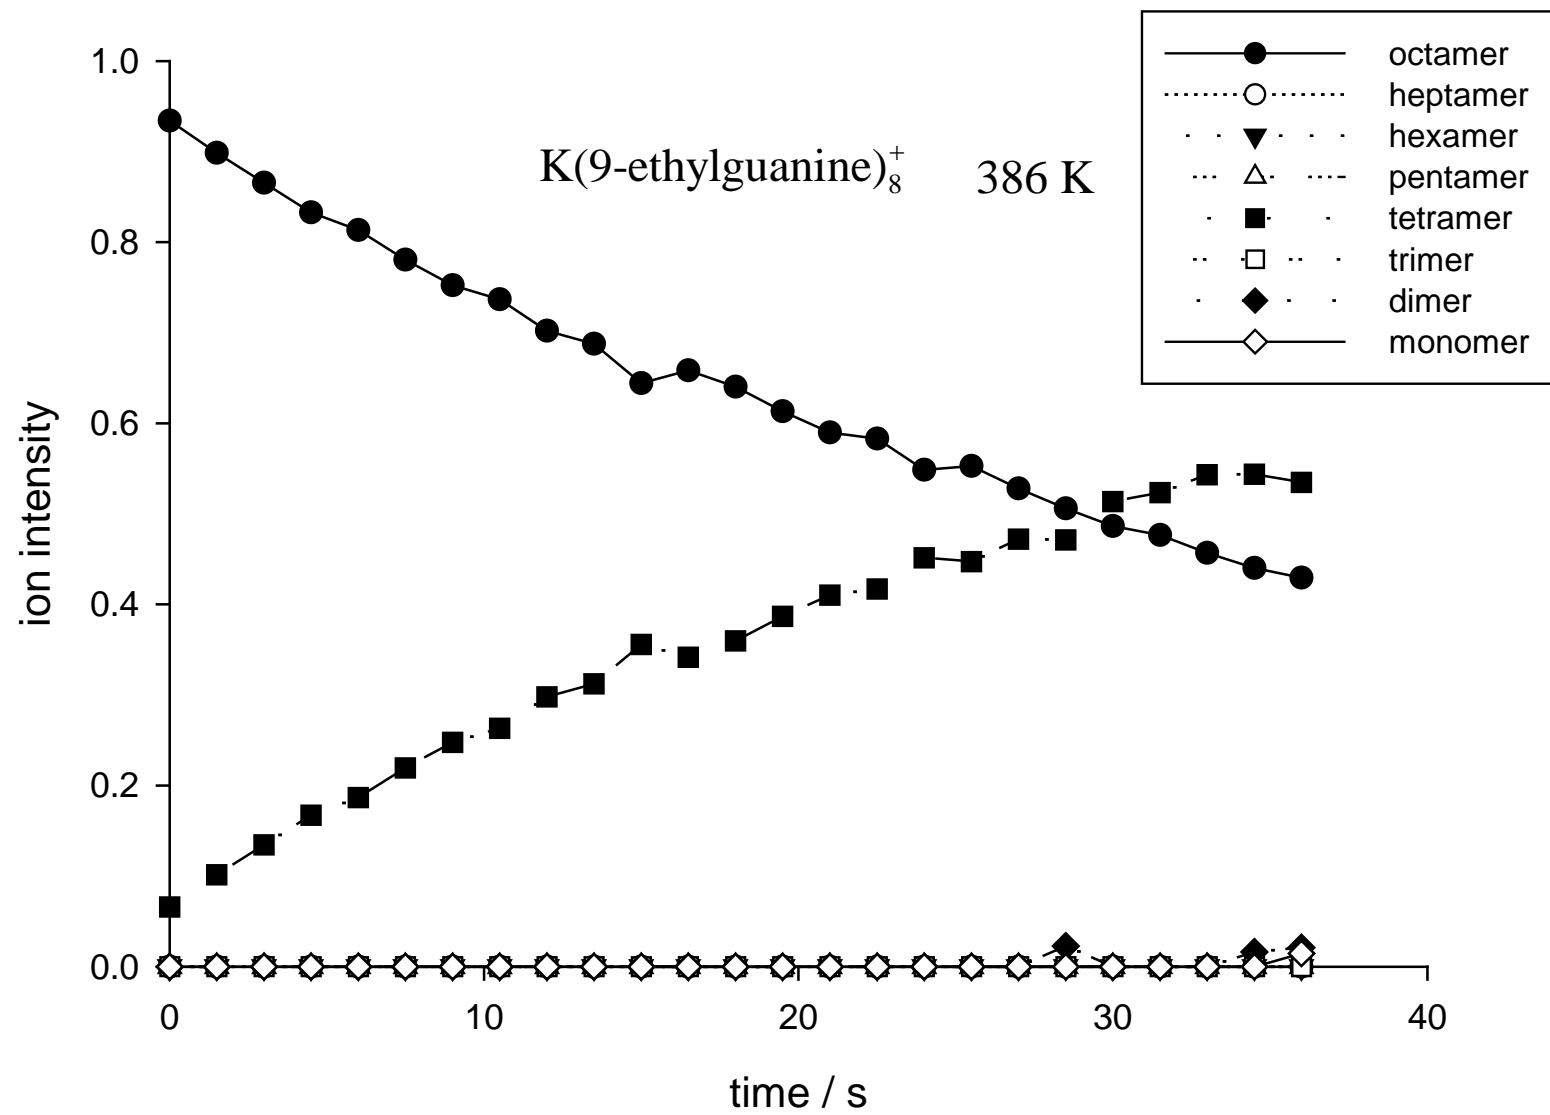

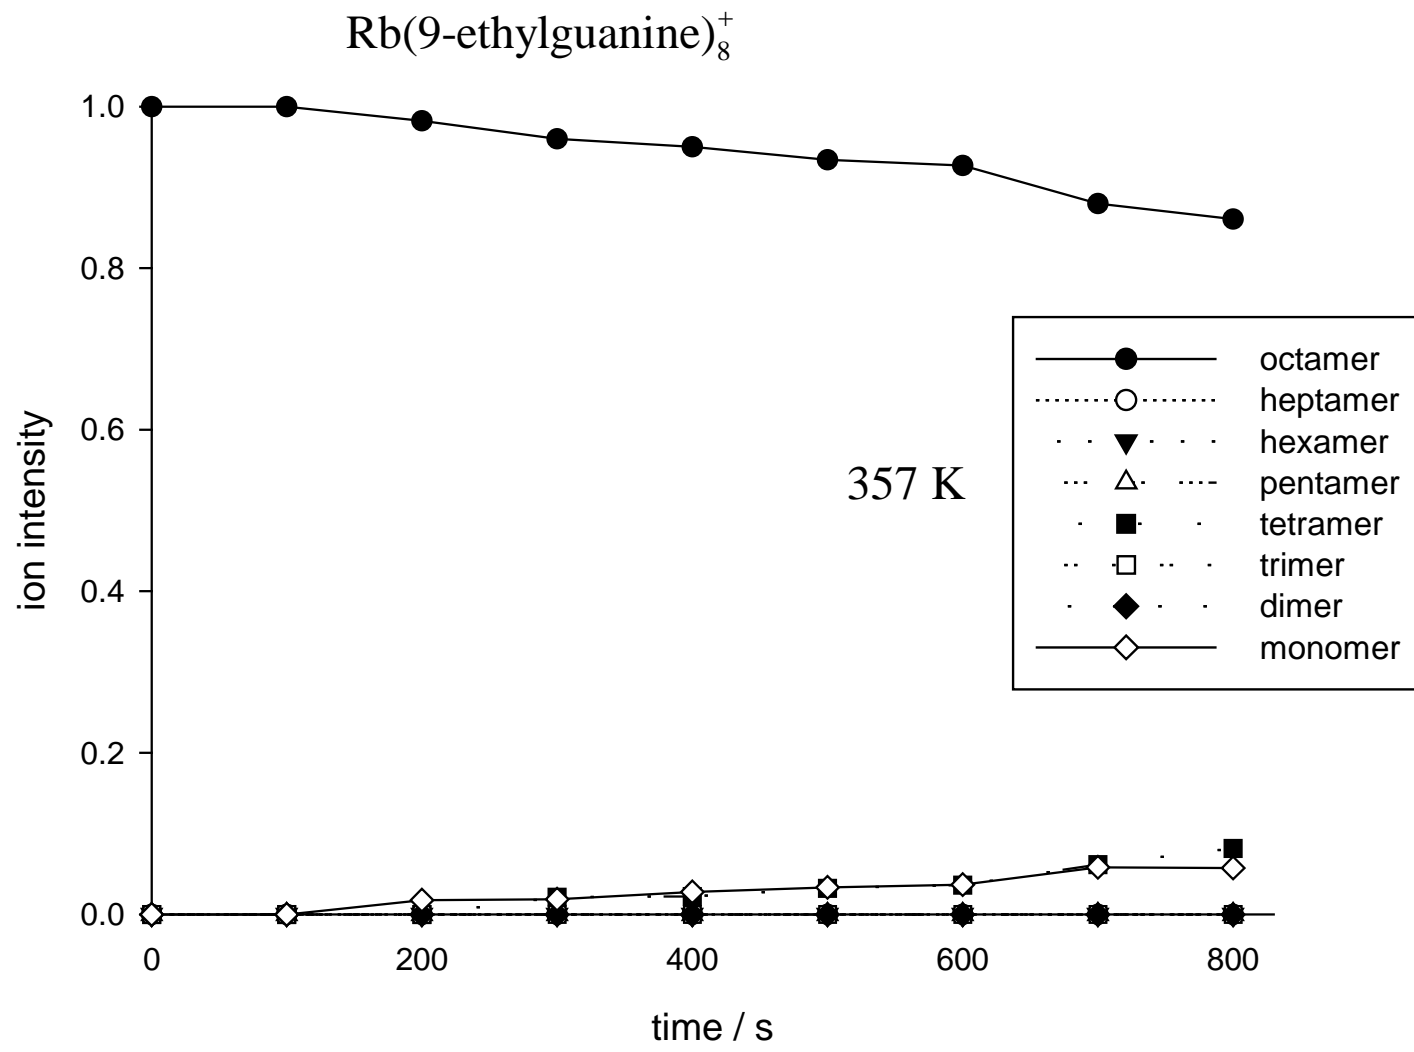

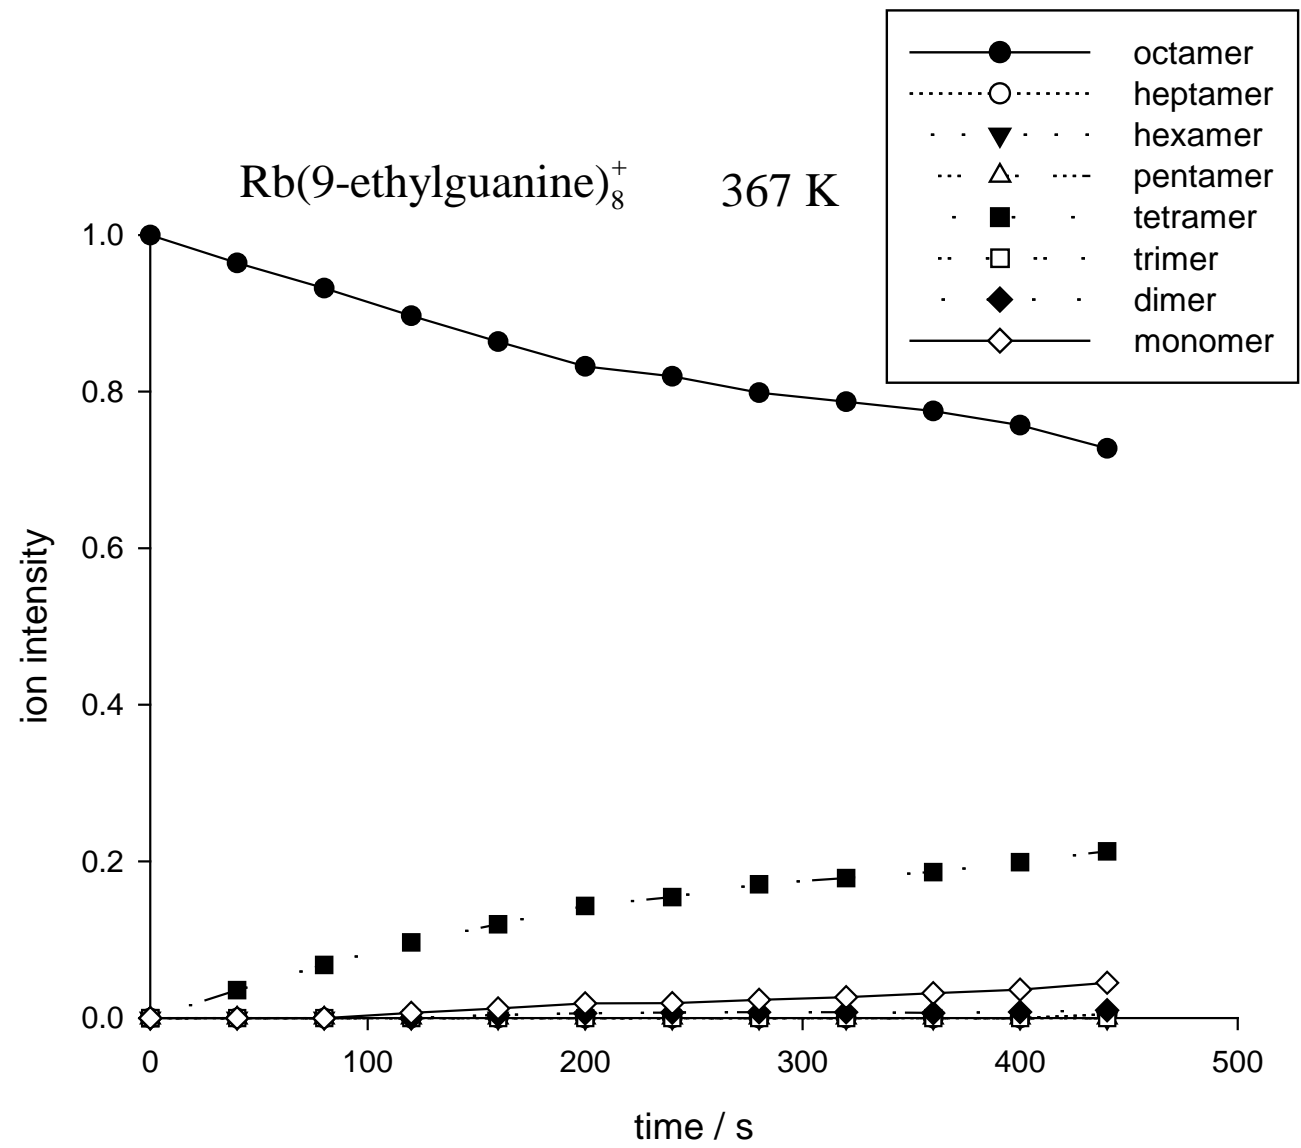

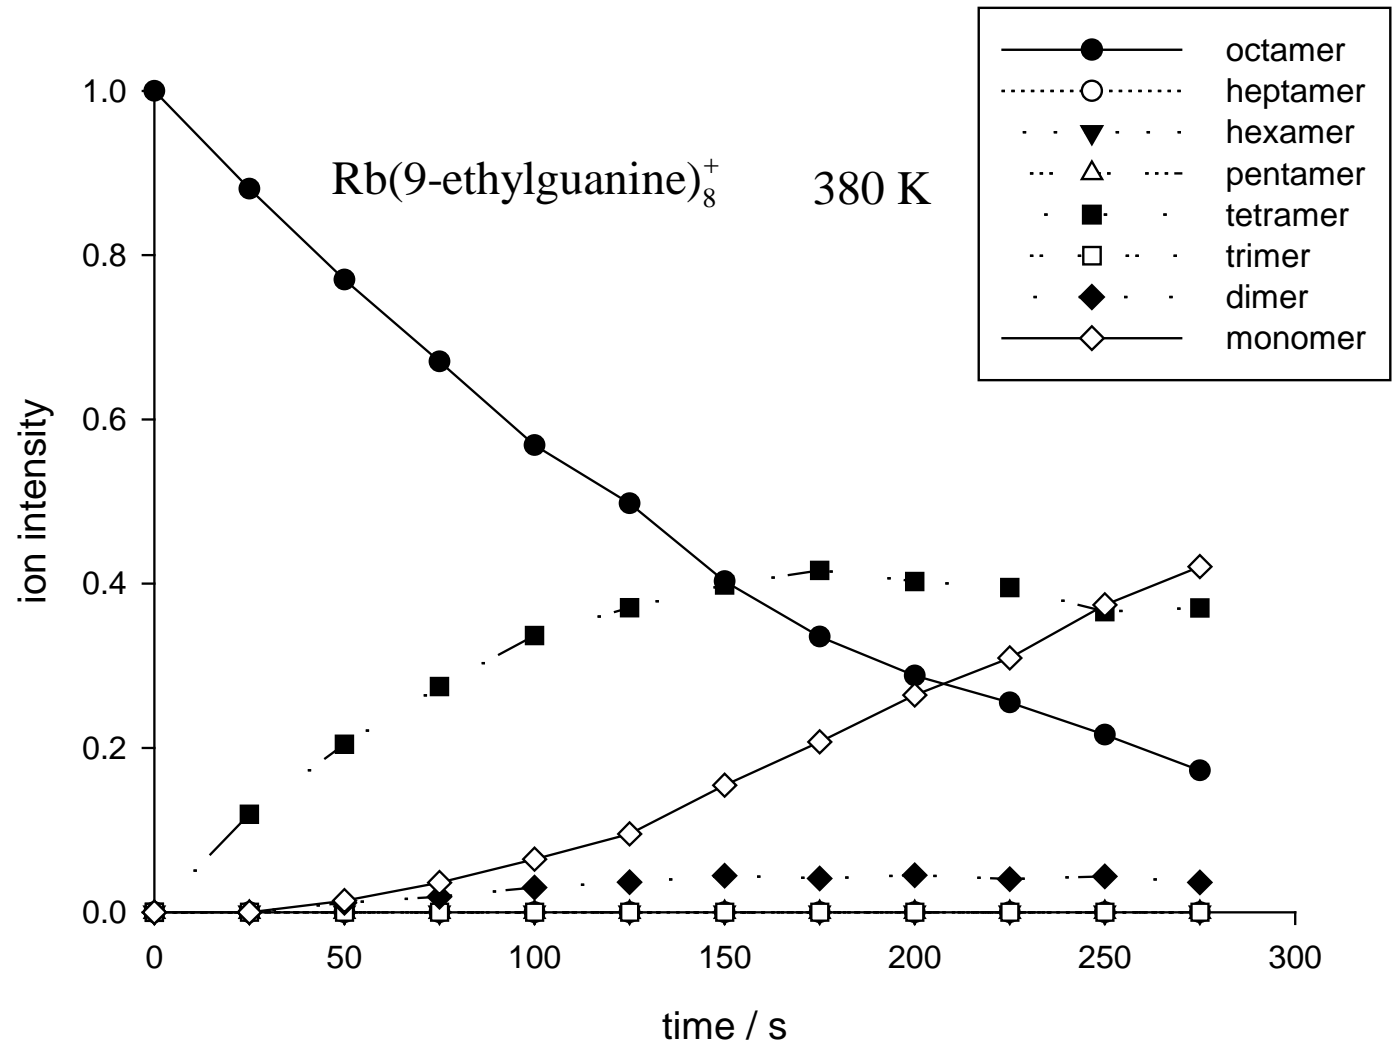

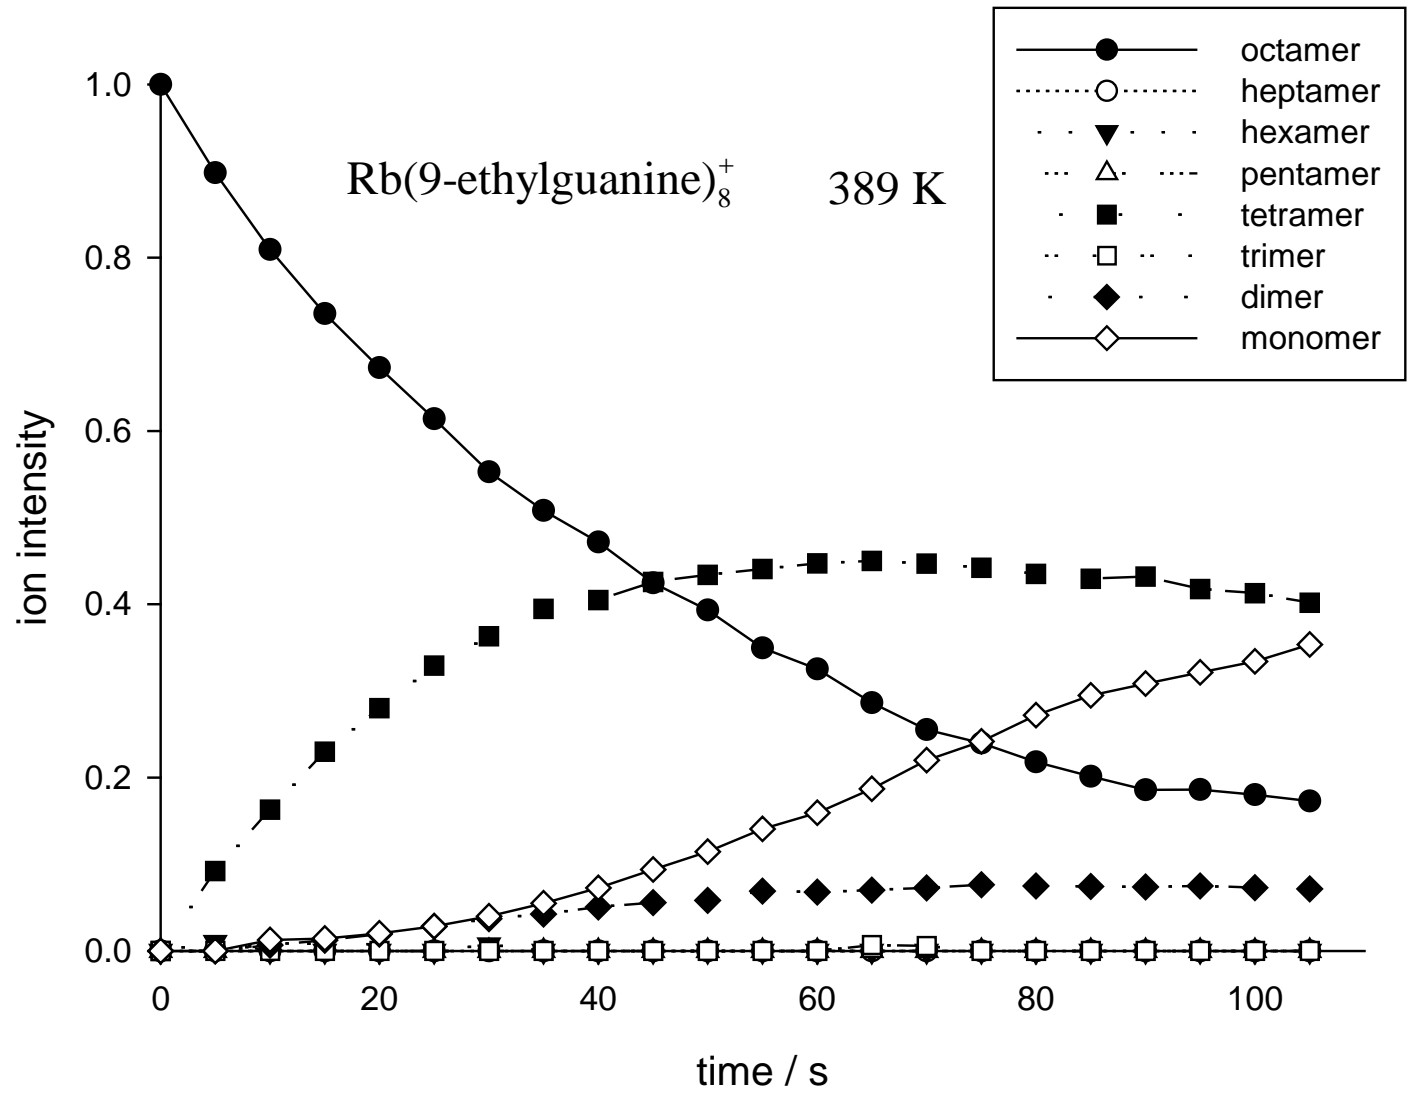



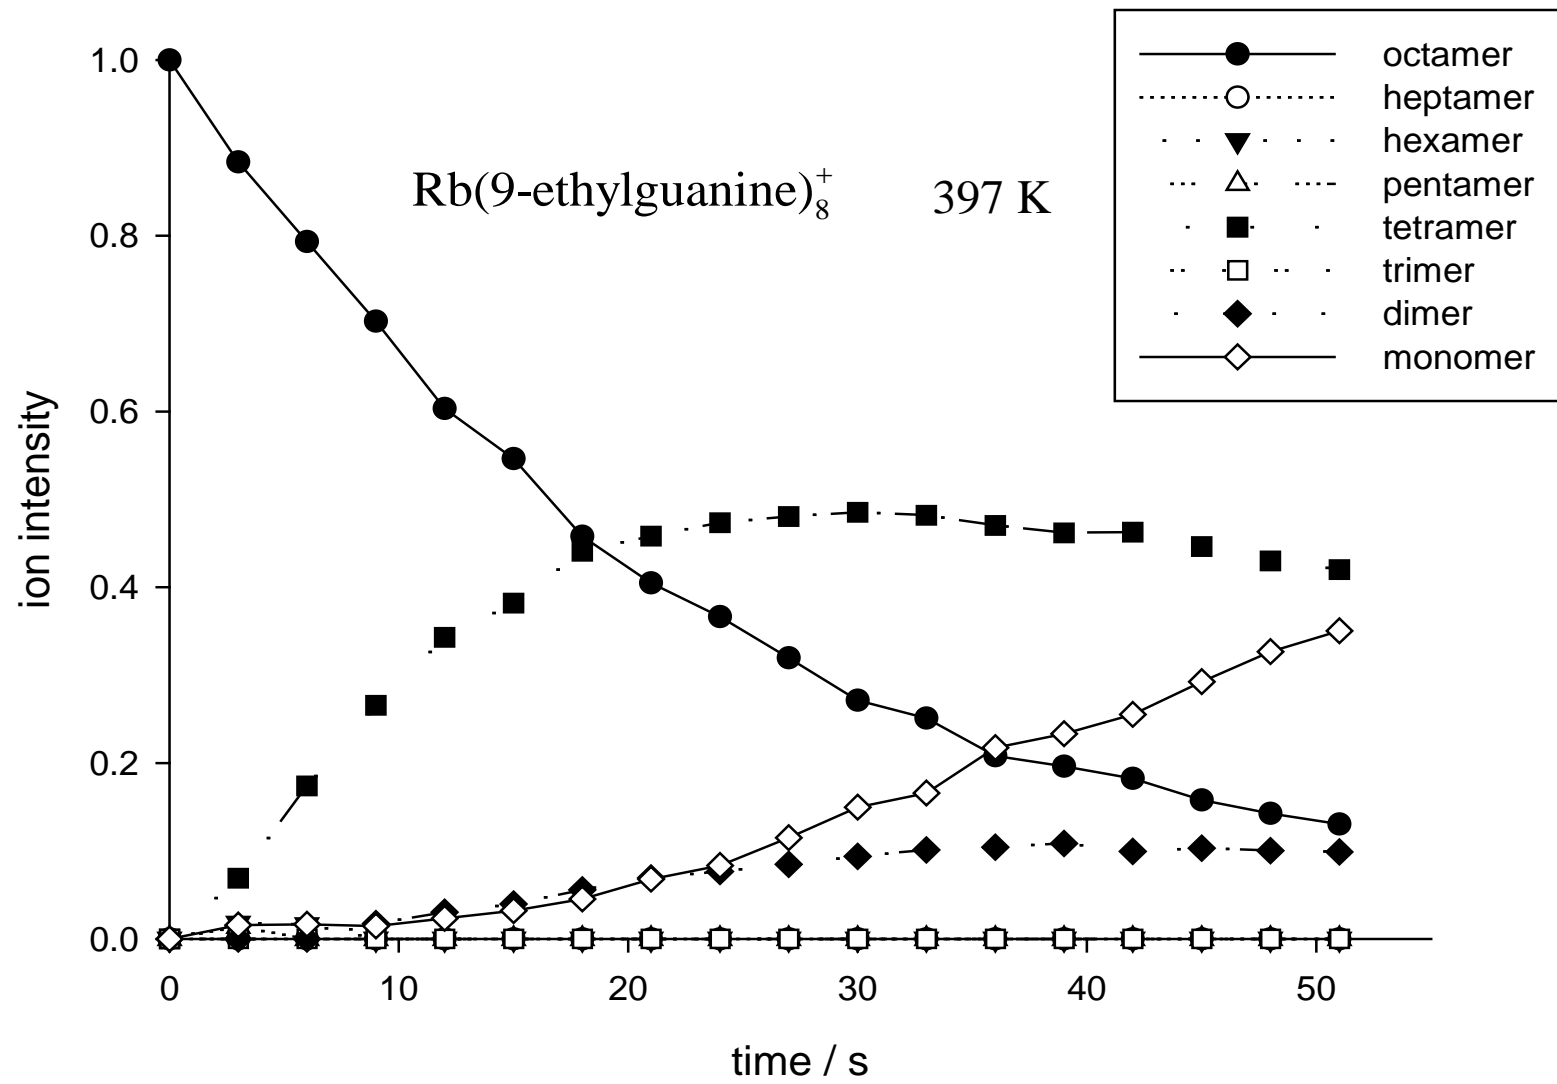

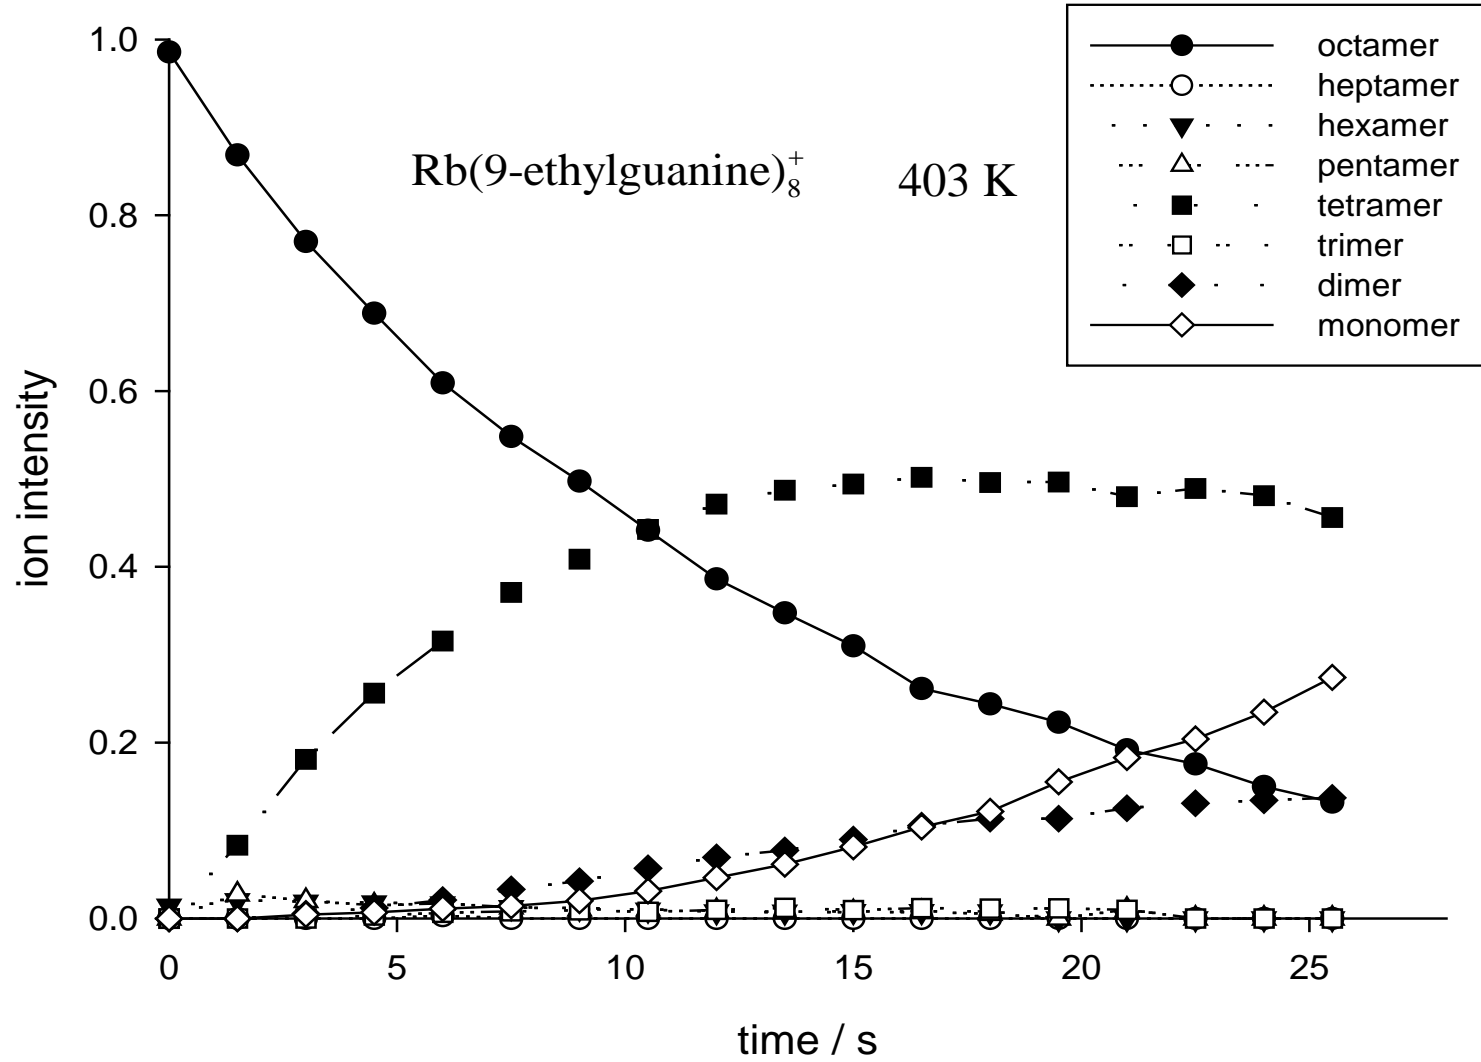

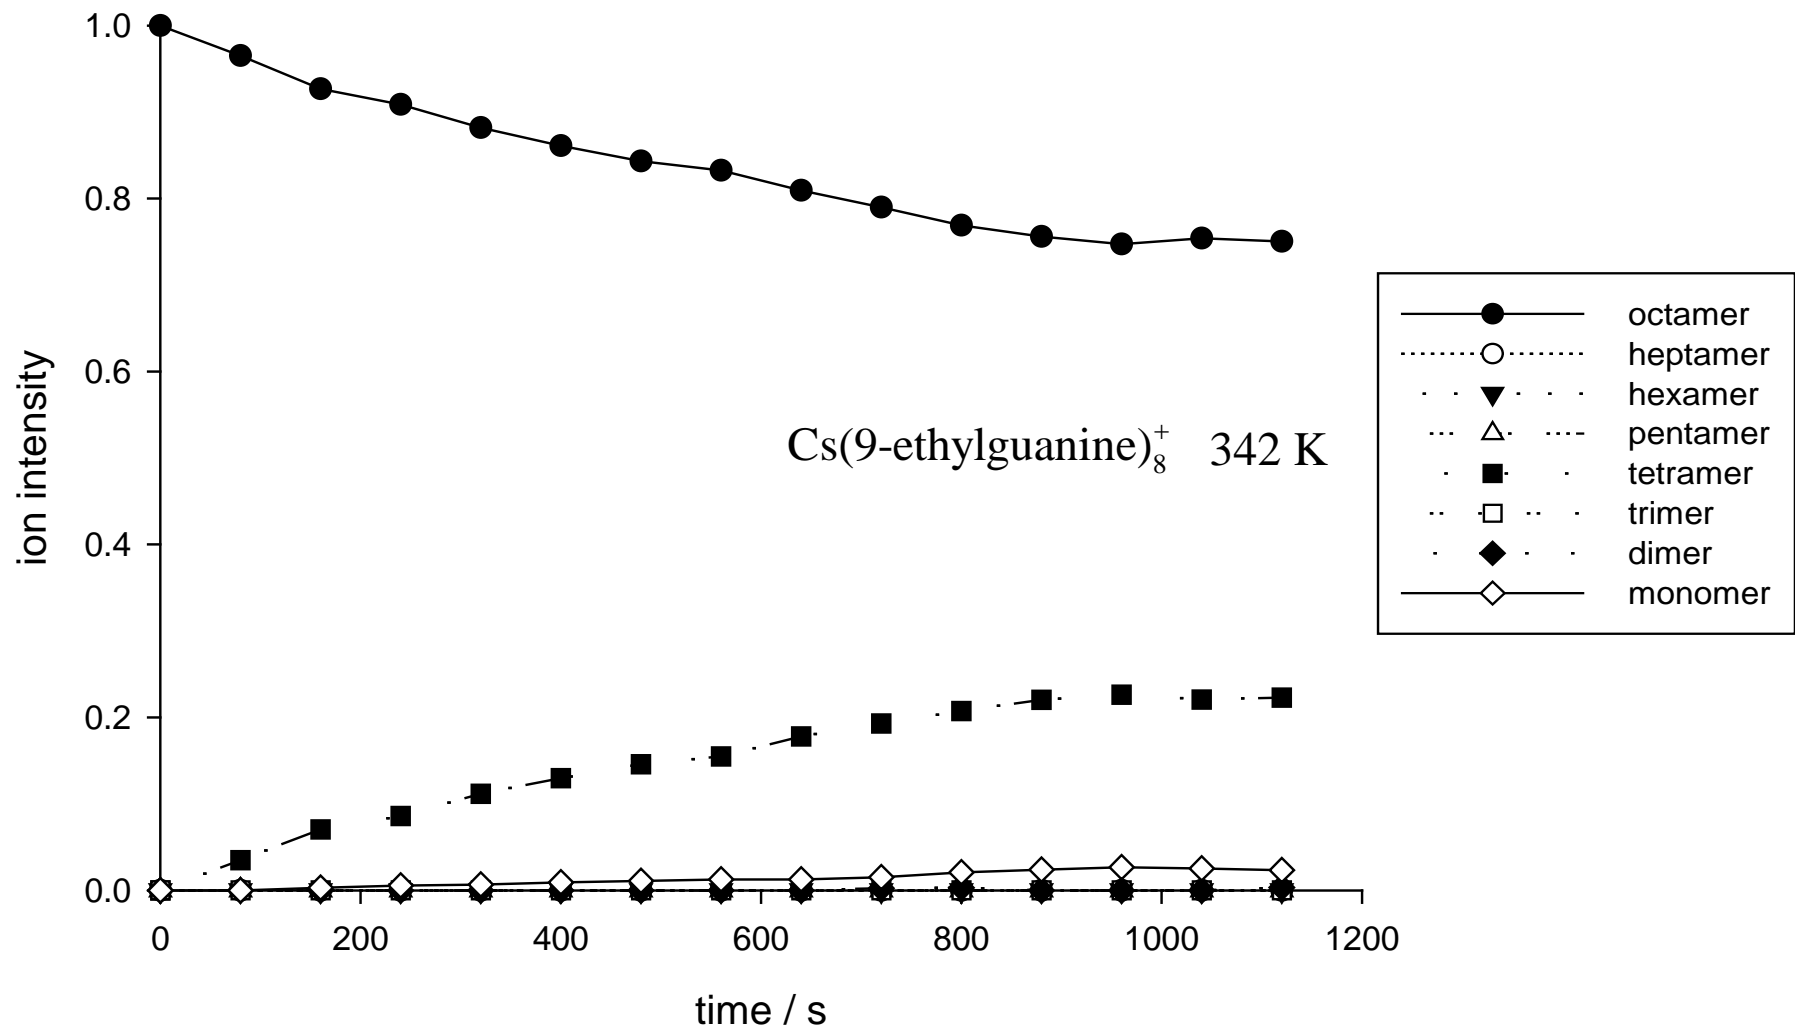

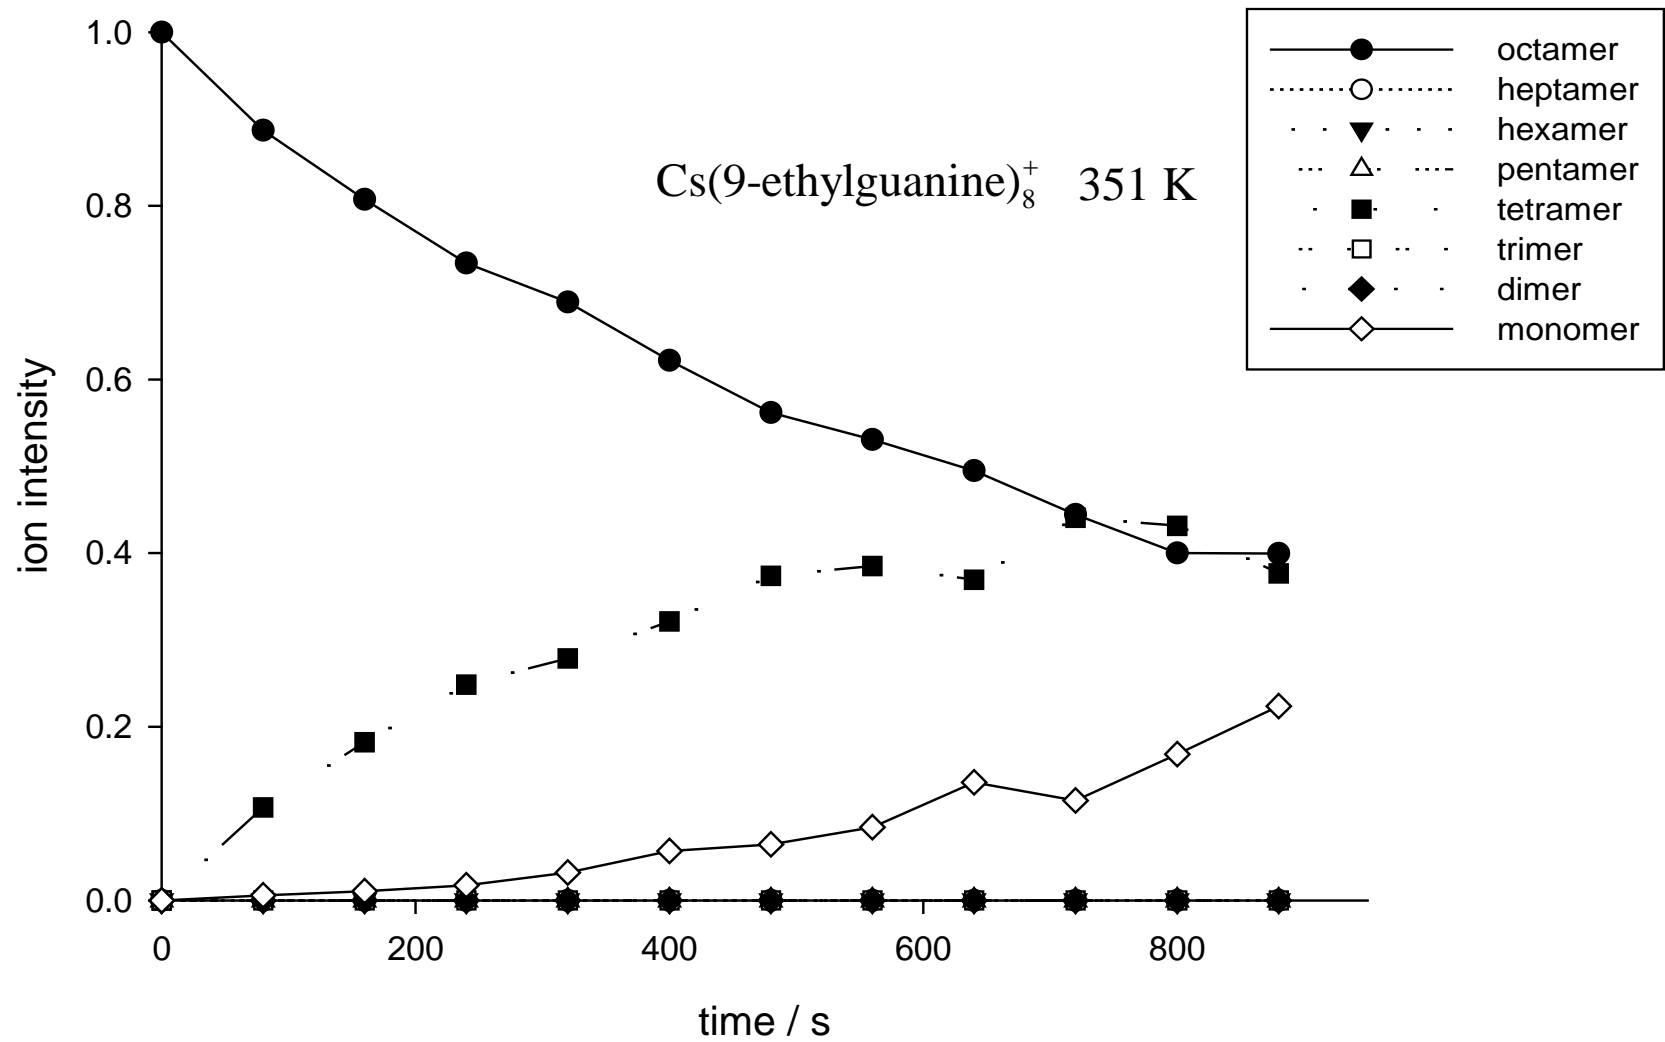

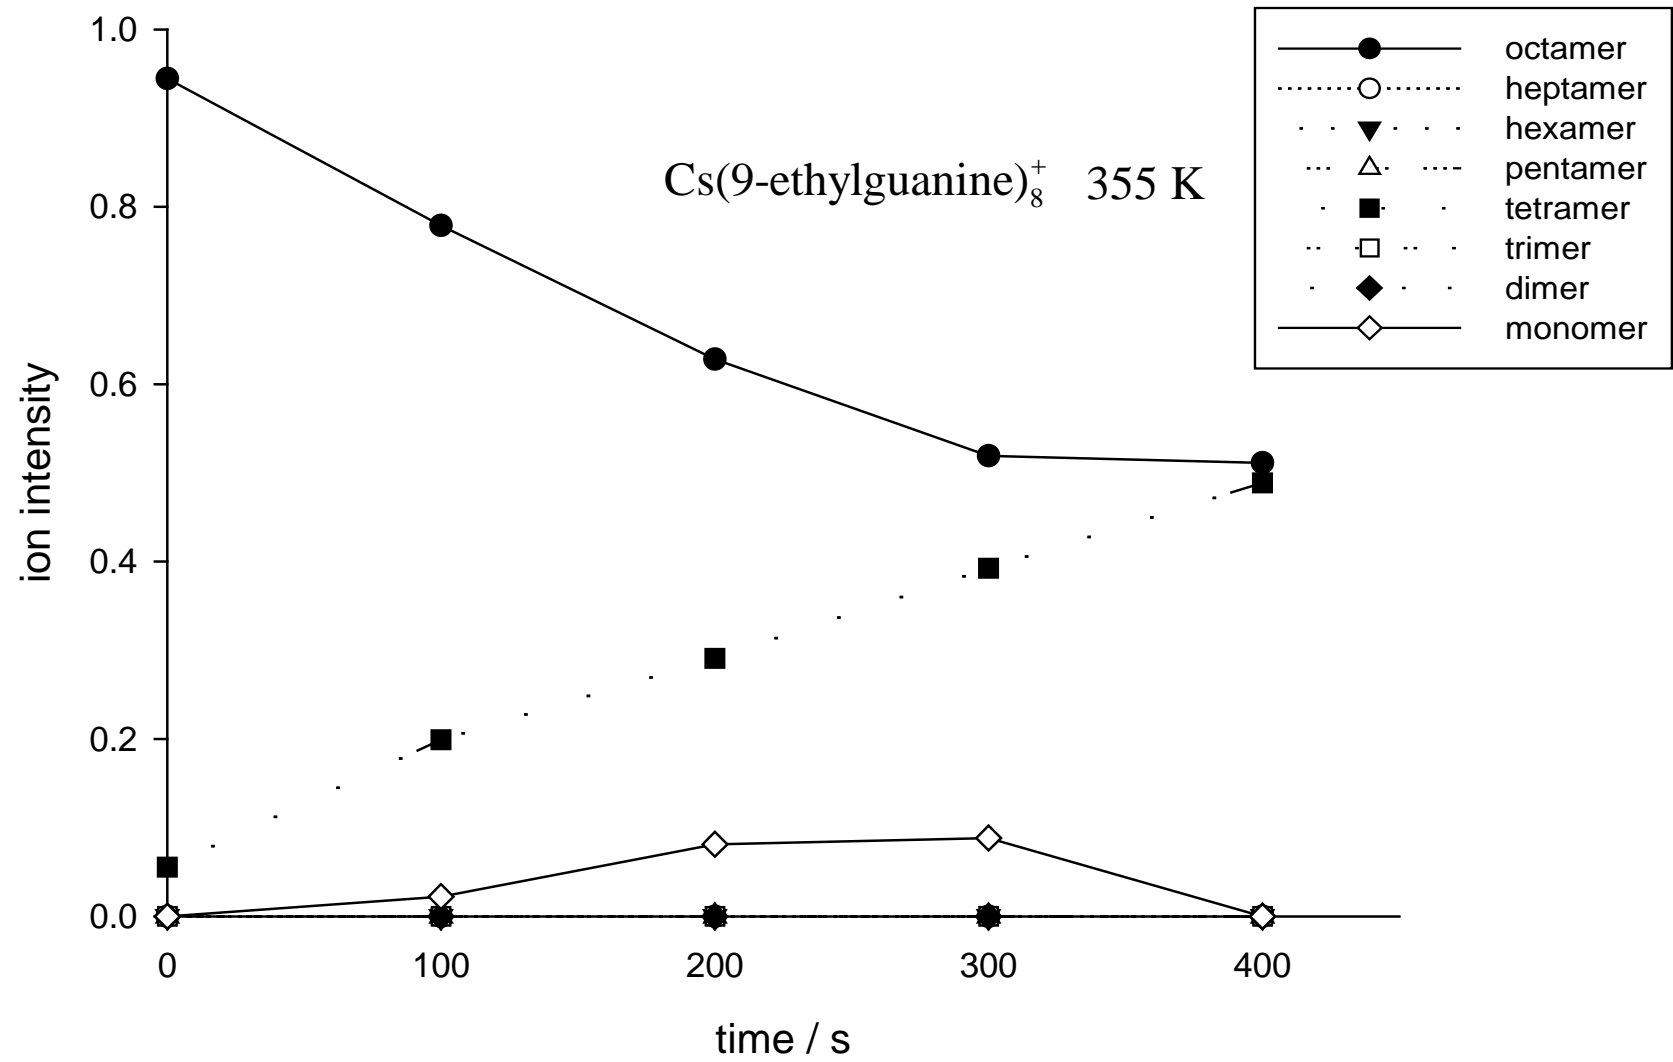

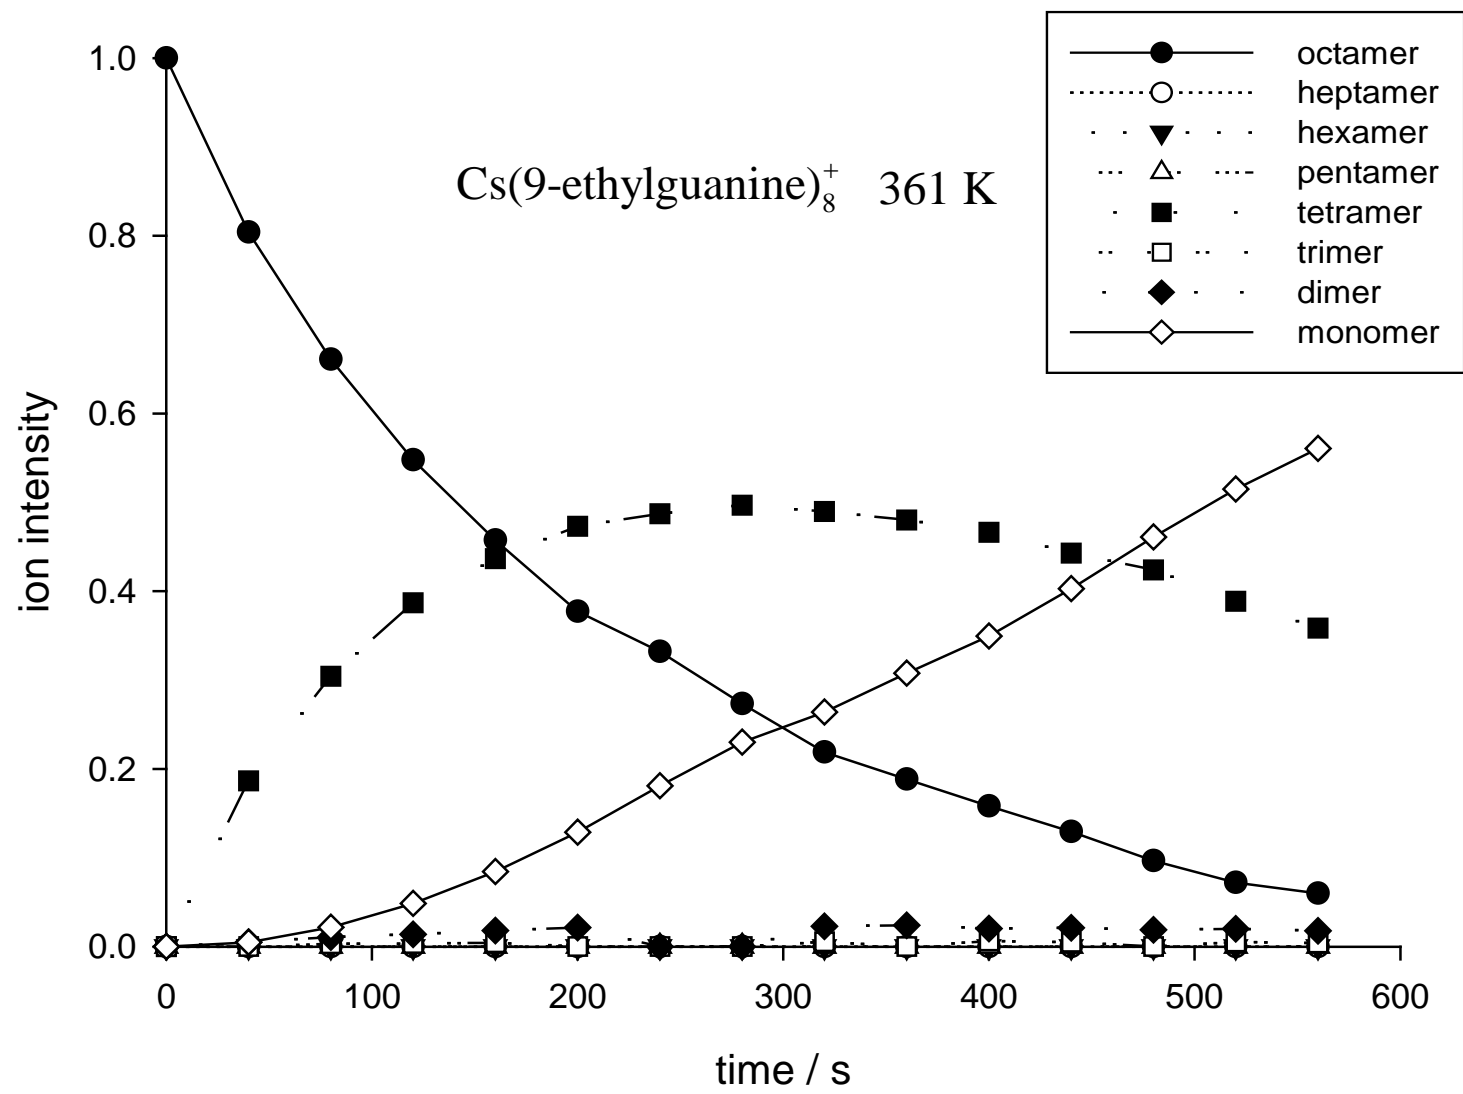

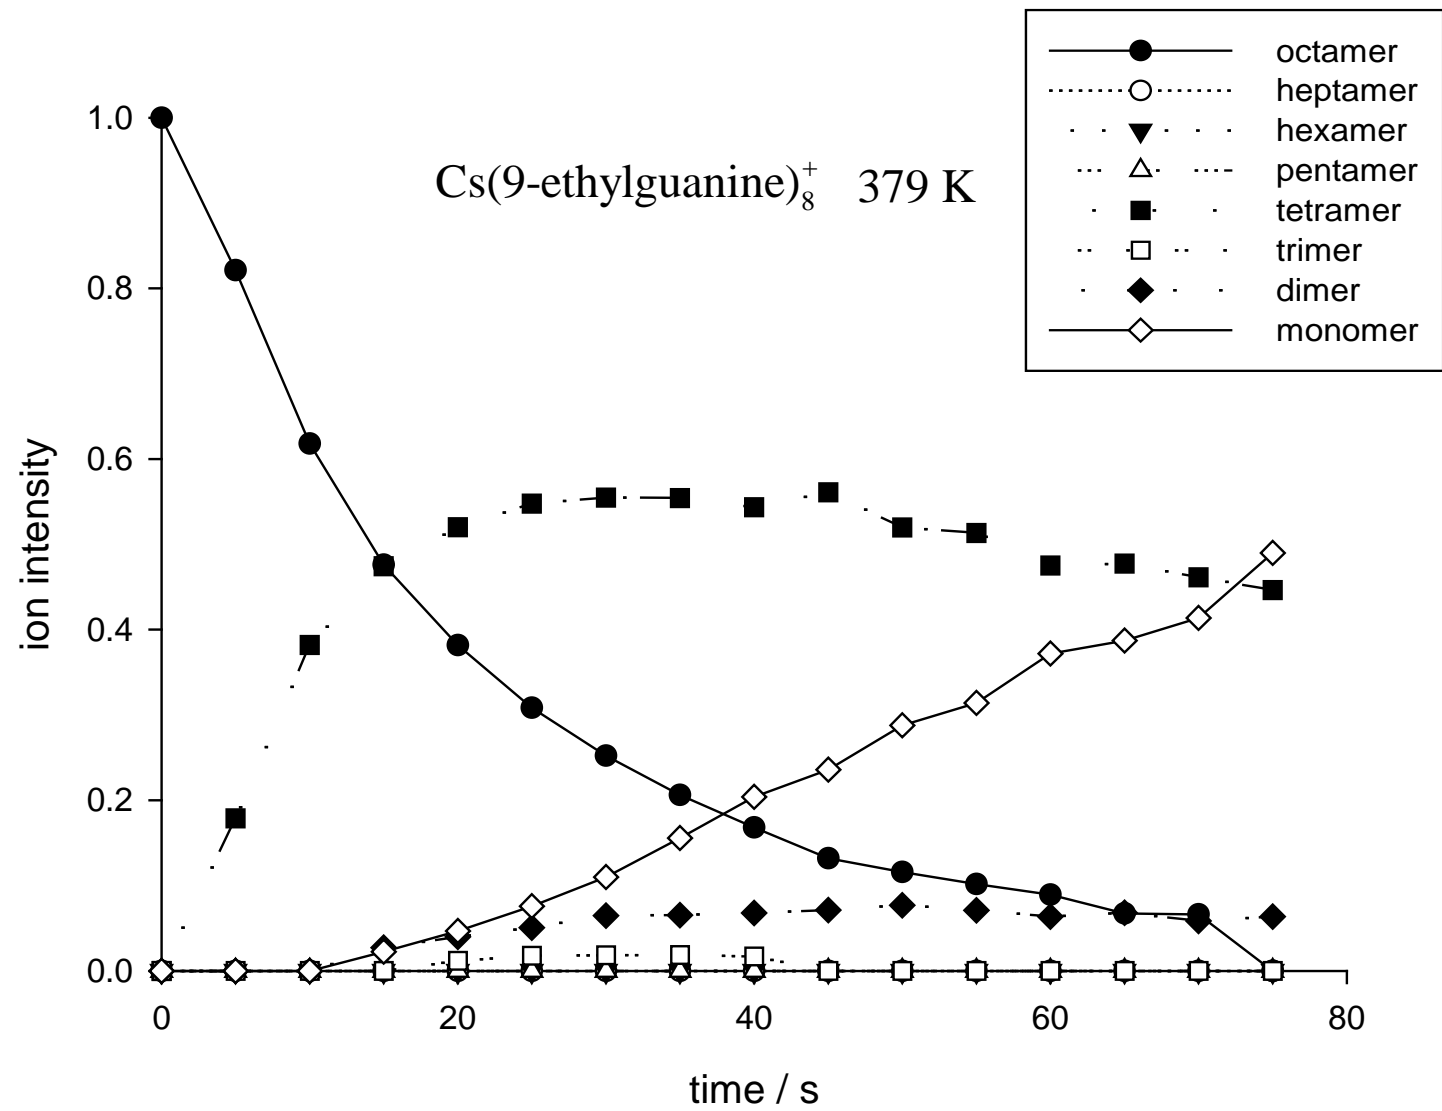

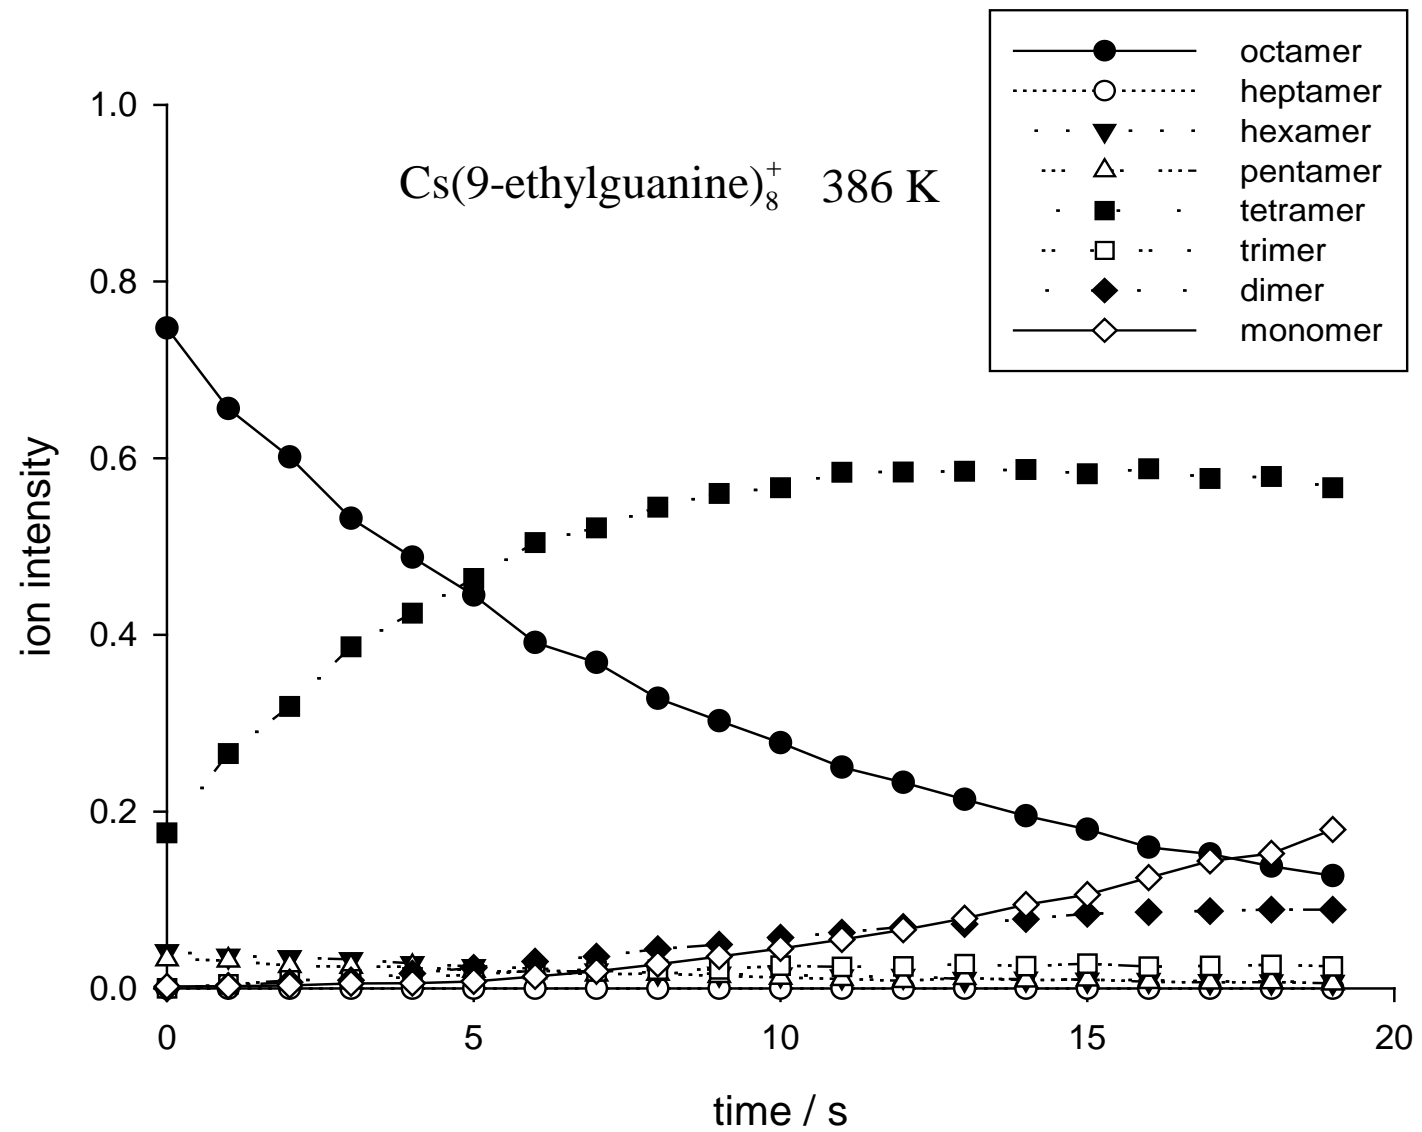



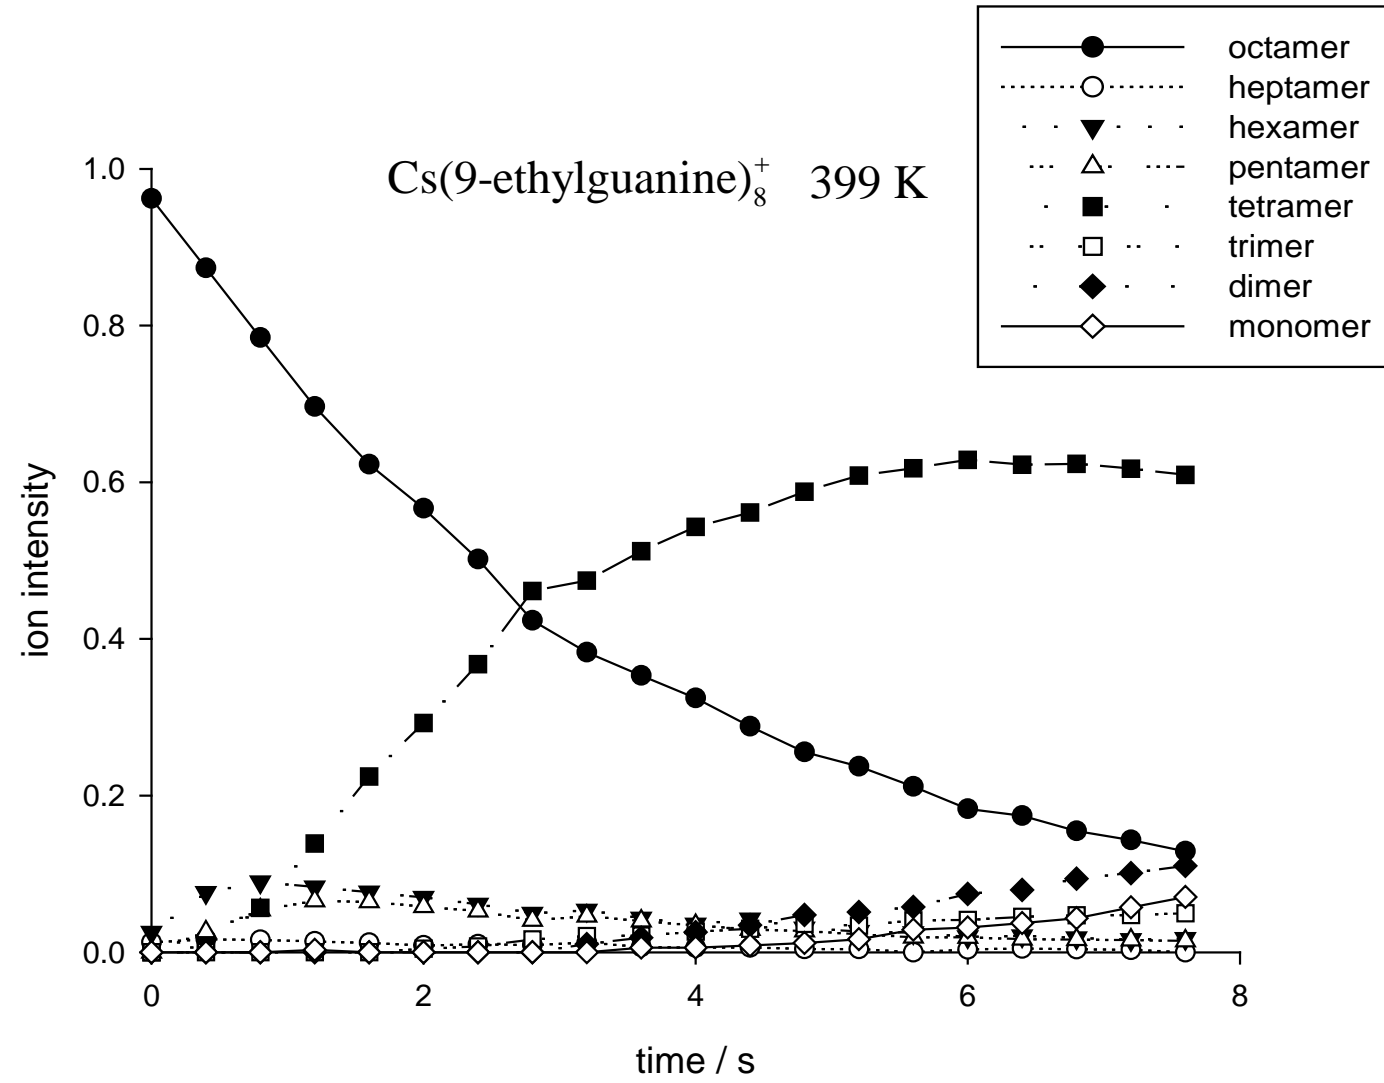

Master equation modeling for  
 $\text{Na}(9eG)_8^+$  with  $A=10^{15}$ , the best fit  
when  $E_0=1.00$  eV

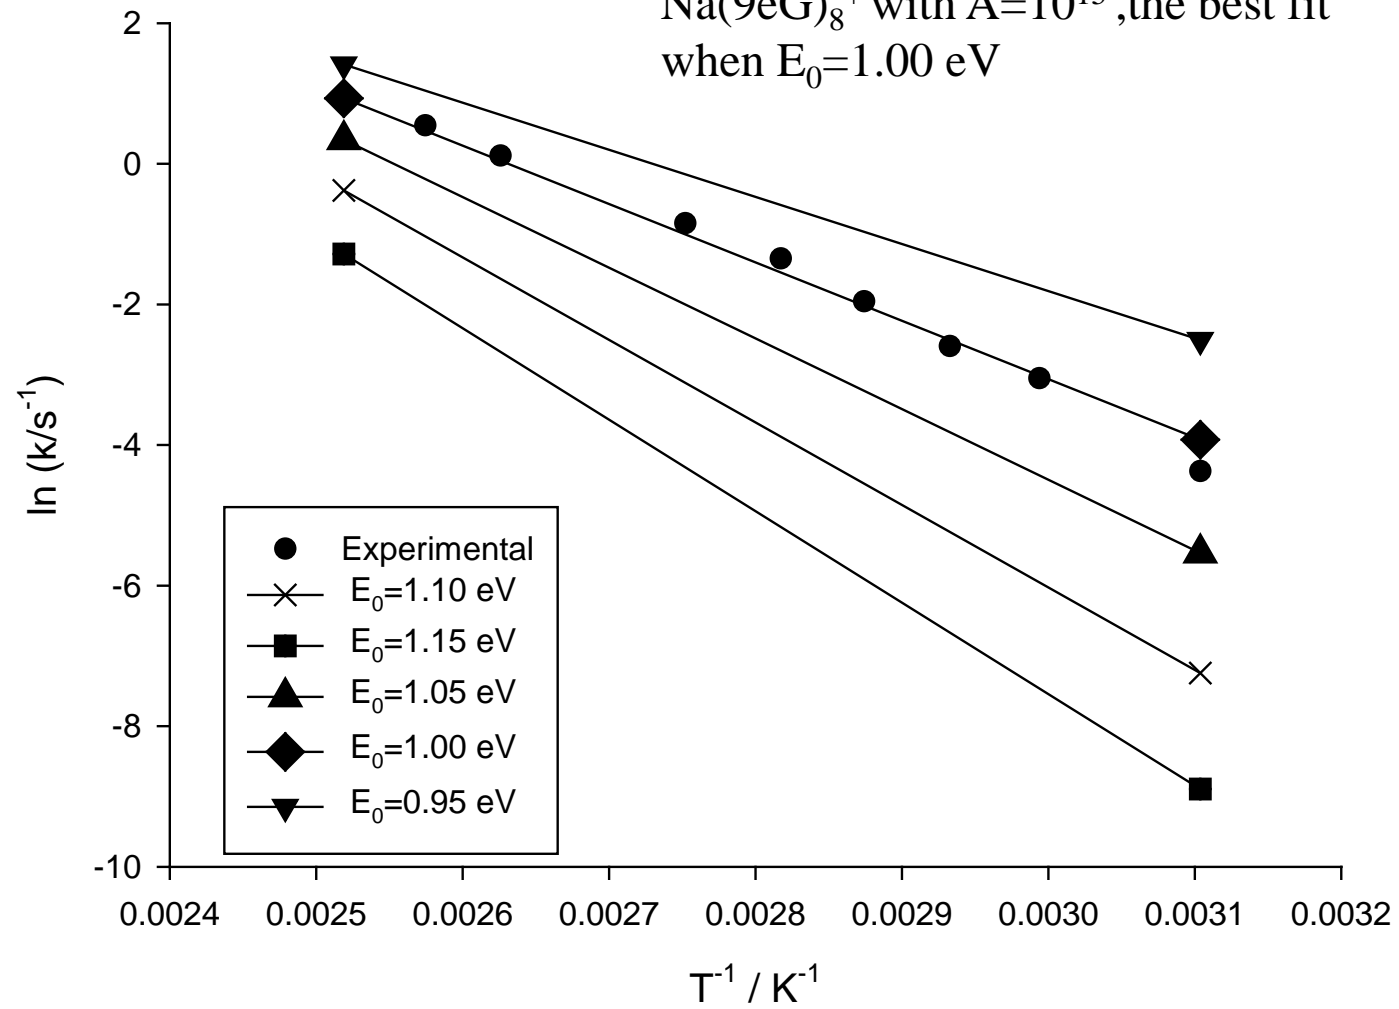

Master equation modeling for  
 $\text{Na}(9\text{eG})_8^+$  with  $A=10^{16}$ , the best fit  
when  $E_0=1.05$

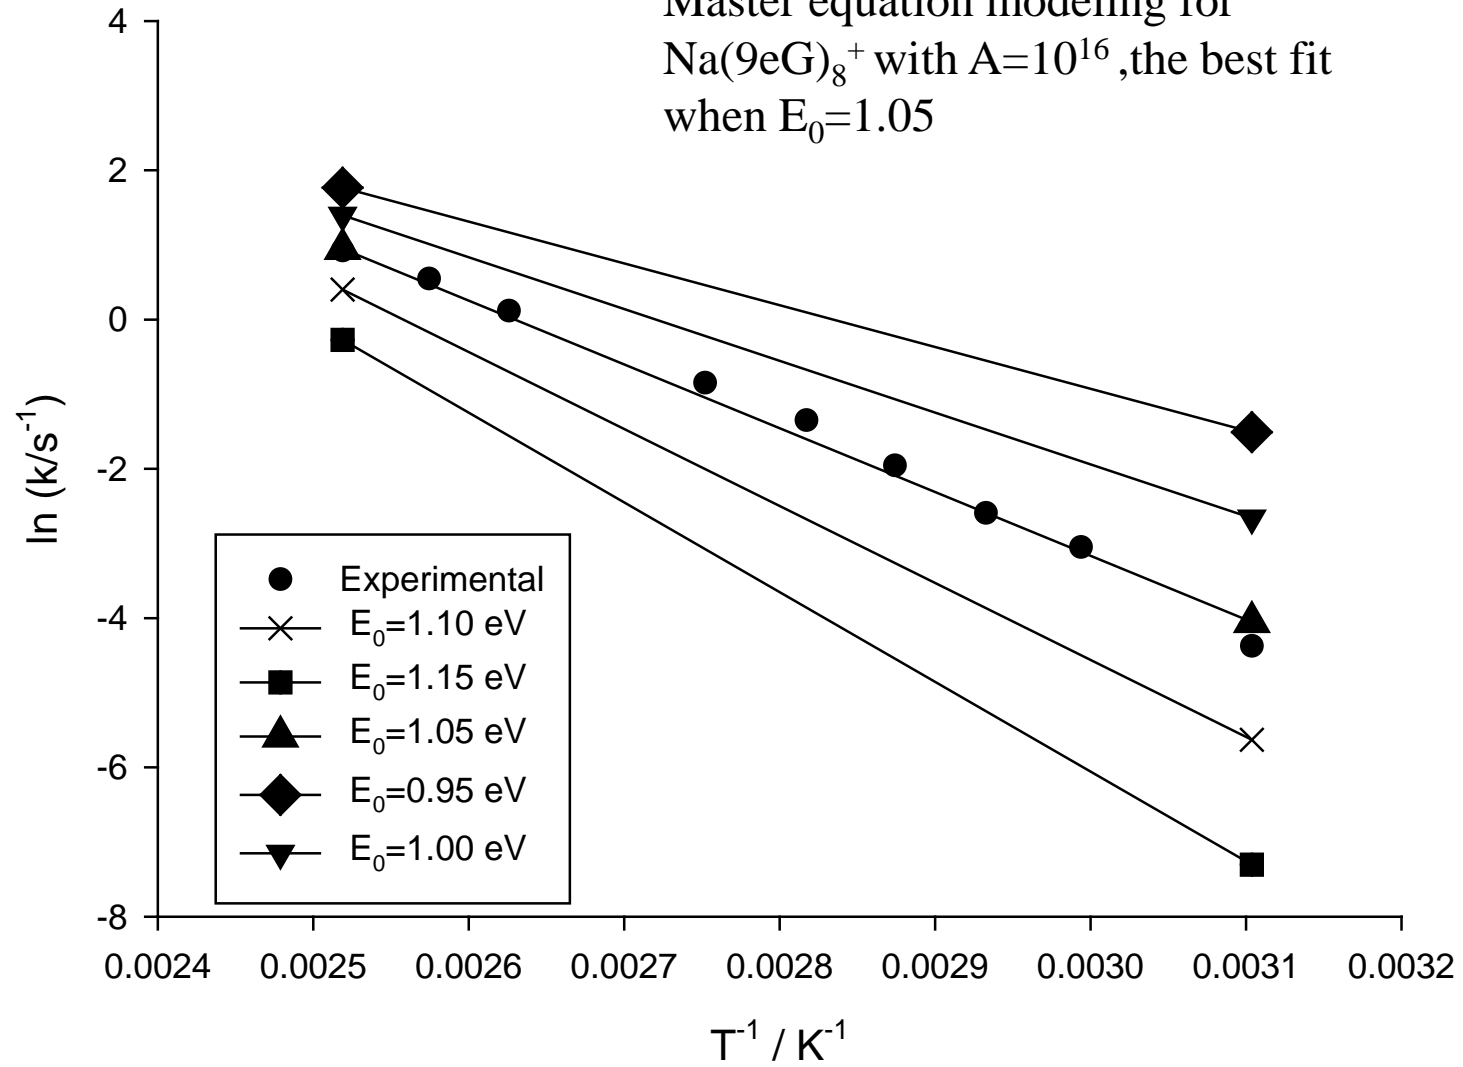

Master equation modeling for Na(9eG)8+  
with  $A=10^{17}$ , the best fit when  $E_0=1.10$  eV

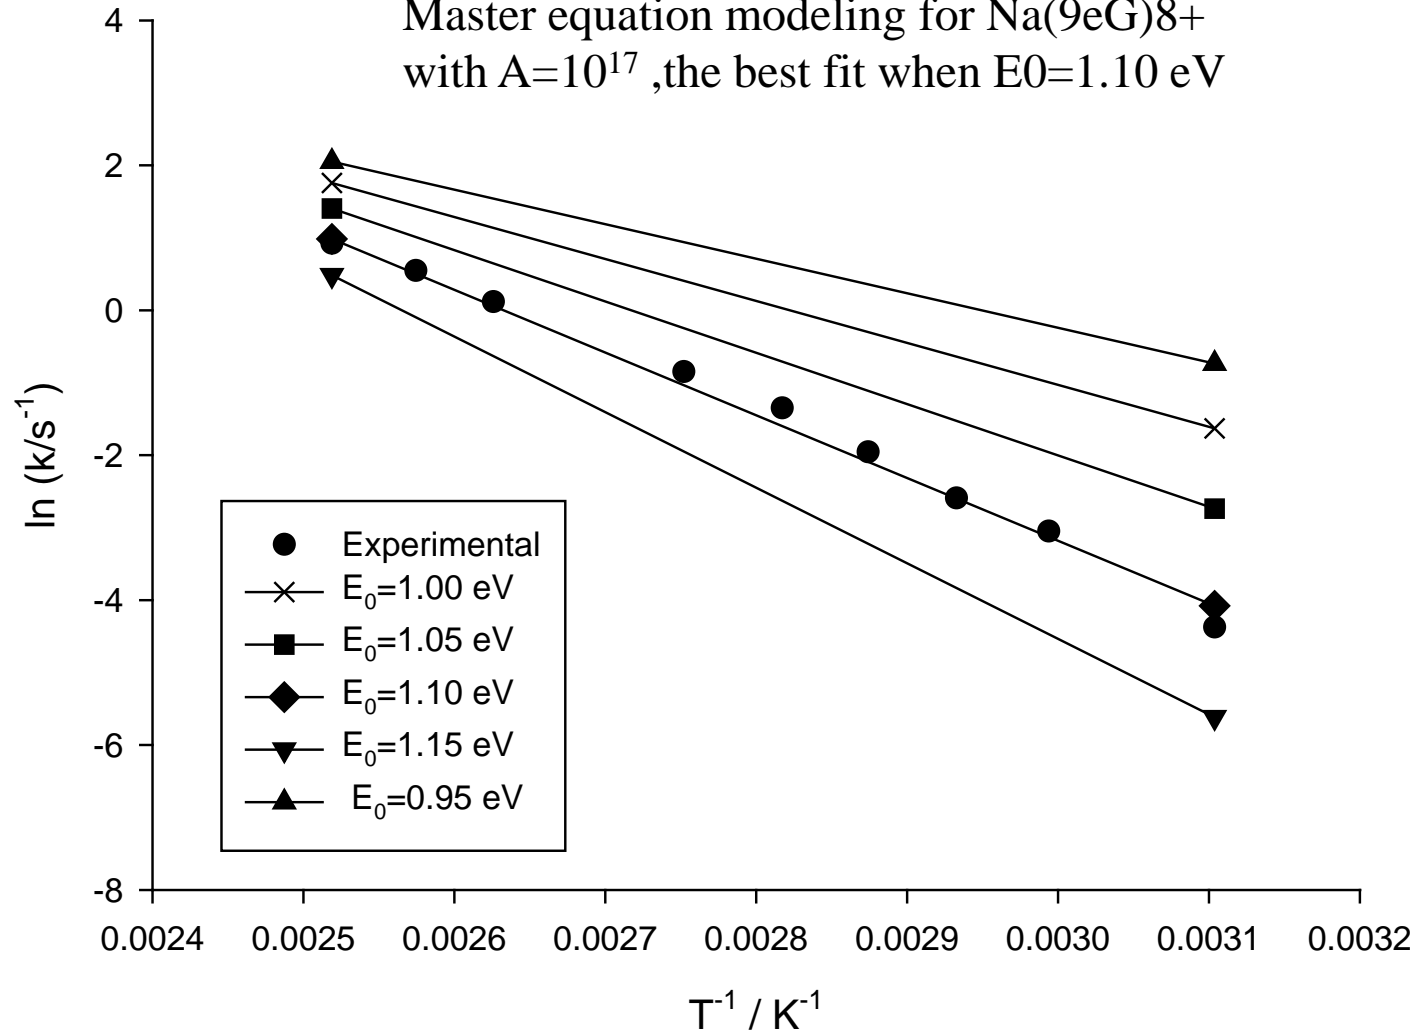

Master equation modeling for  $\text{K}(9\text{eG})_8^+$  with  
 $A=10^{21}$ , the best fit when  $E_0=1.70$  eV

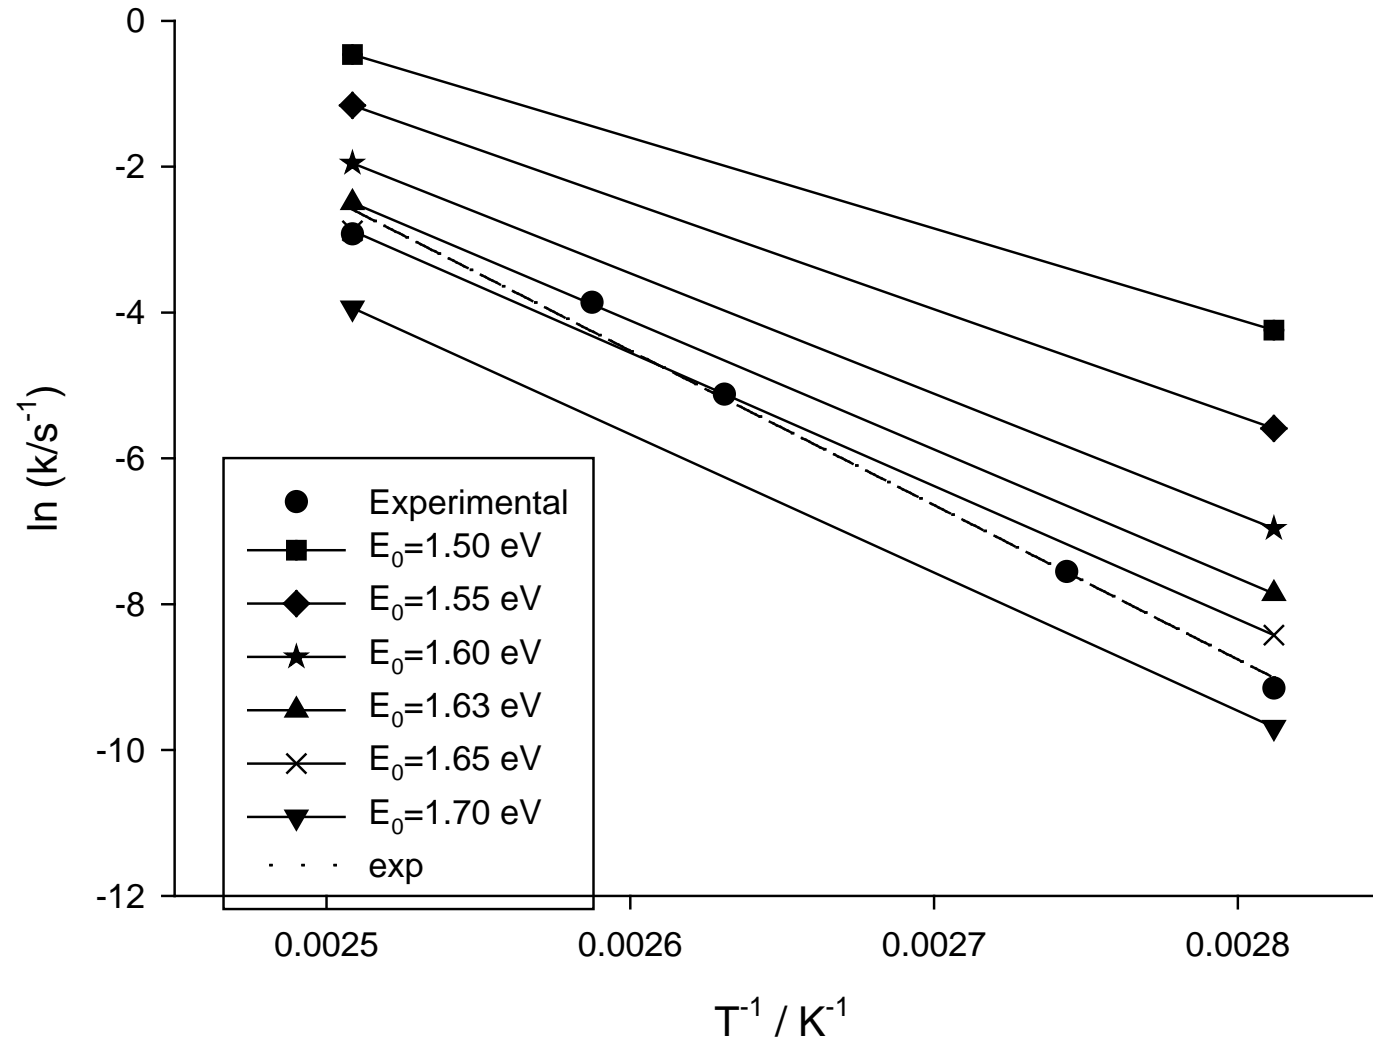

Master equation modeling for  
 $\text{K}(9\text{eG})_8^+$  with  $A=10^{22}$ , the best fit  
when  $E_0=1.75$  eV

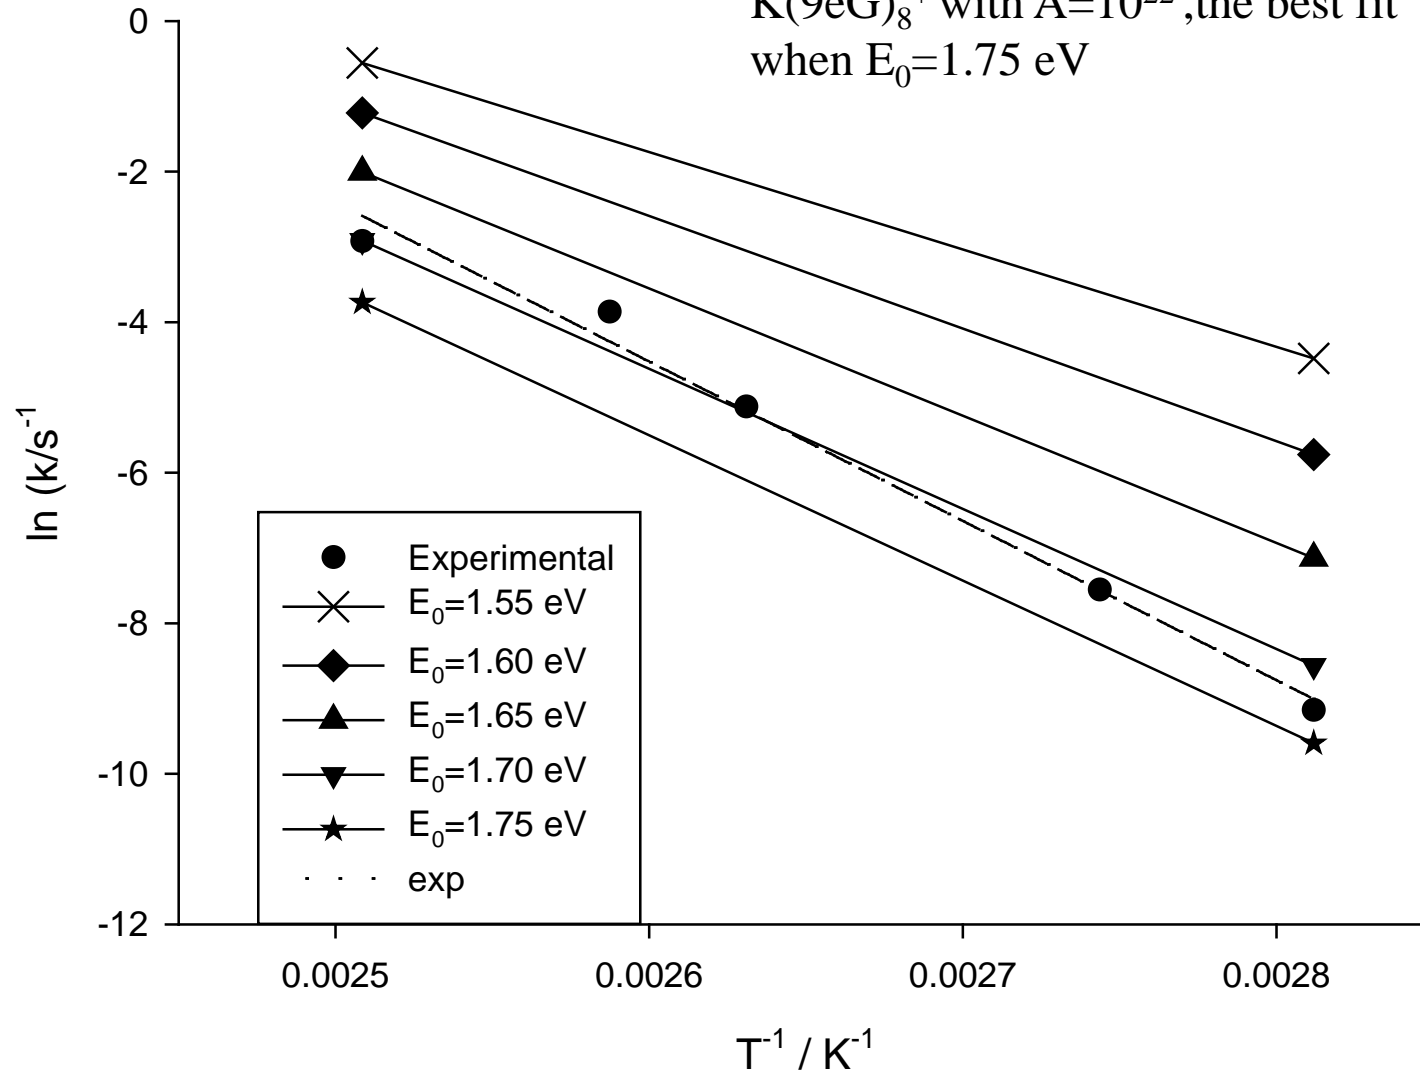

Master equation modeling for  
 $\text{K}(9\text{eG})_8^+$  with  $A=10^{23}$ , the best fit  
when  $E_0=1.79$  eV

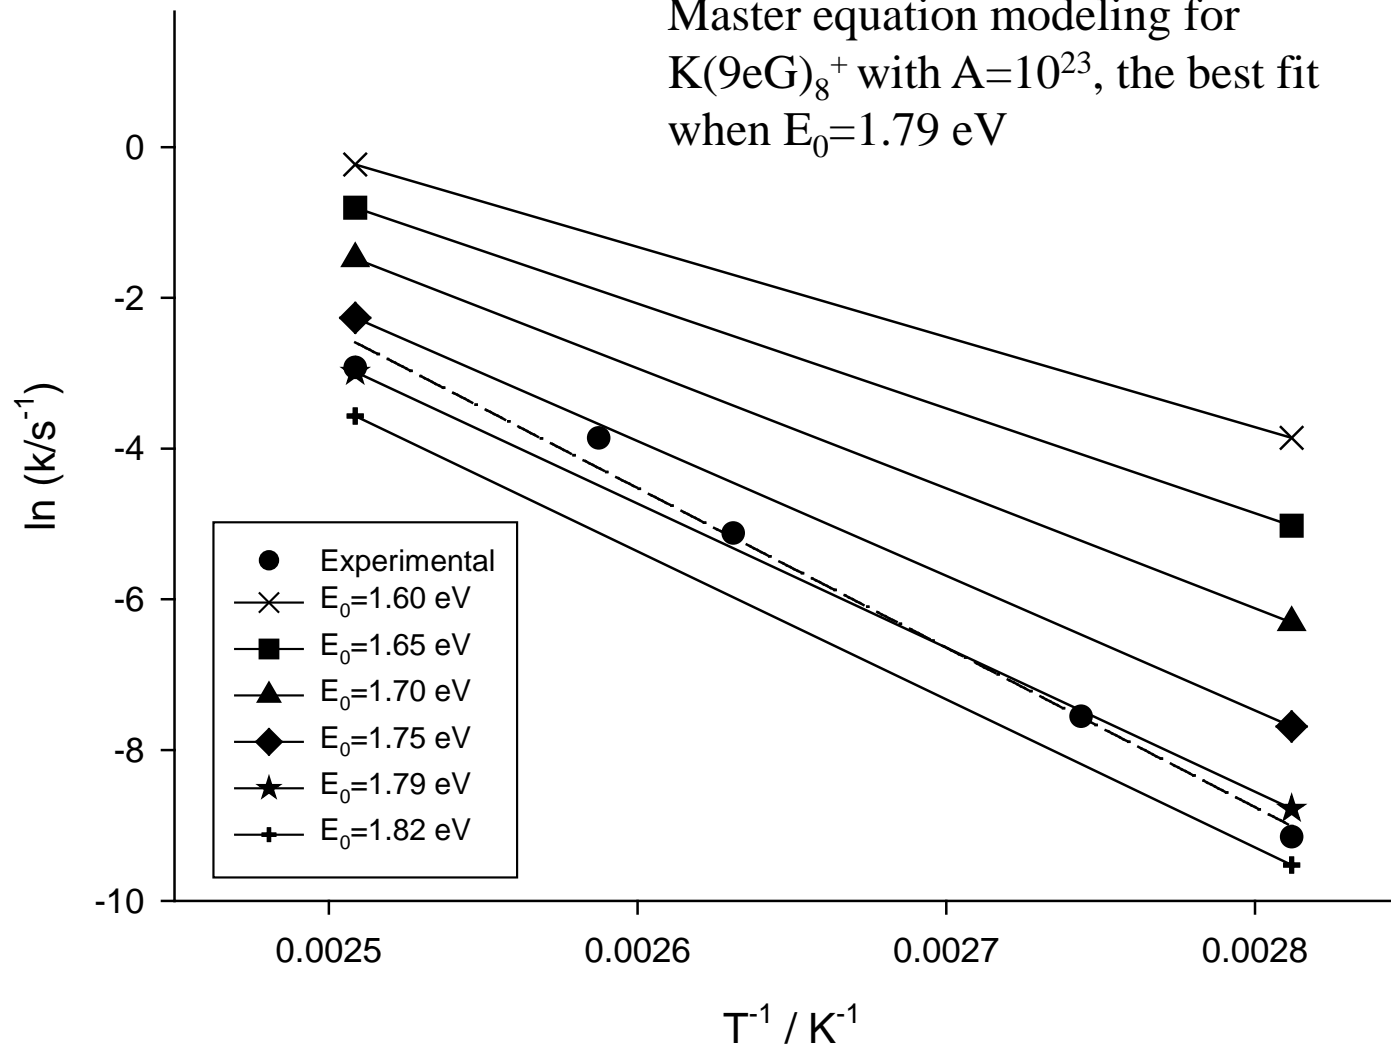

Supplement: c6cp07301h1.pdf [file c6cp07301h1.pdf]
